1  
2  
3  
4  
5  
6  
7  
8  
9  
10  
11  
12  
13  
14  
15  
16  
17  
18  
19

Article type: **Research Advances**

**Axon-dependent expression of YAP/TAZ mediates Schwann cell remyelination  
but not proliferation after nerve injury**

Matthew Grove<sup>1,2</sup>, Hyunkyung Lee<sup>1,2</sup>, Huaqing Zhao<sup>3</sup>, and Young-Jin Son<sup>1,2\*</sup>

<sup>1</sup>Shriners Hospitals Pediatric Research Center and Center for Neural Repair and Rehabilitation,  
<sup>2</sup>Department of Anatomy and Cell Biology, <sup>3</sup>Department of Clinical Sciences, Lewis Katz  
School of Medicine, Temple University, Philadelphia, PA 19140

\* Corresponding author: Young-Jin Son, PhD  
Tel: (215) 926-9354  
Email: yson@temple.edu

20 **ABSTRACT**

21

22 Previously we showed that YAP/TAZ promote not only proliferation but also differentiation of  
23 immature Schwann cells (SCs), thereby forming and maintaining the myelin sheath around  
24 peripheral axons (Grove et al., 2017). Here we show that YAP/TAZ are required for mature SCs  
25 to restore peripheral myelination, but not to proliferate, after nerve injury. We find that  
26 YAP/TAZ dramatically disappear from SCs of adult mice concurrent with axon degeneration  
27 after nerve injury. They reappear in SCs only if axons regenerate. YAP/TAZ ablation does not  
28 impair SC proliferation or transdifferentiation into growth promoting repair SCs. SCs lacking  
29 YAP/TAZ, however, fail to upregulate myelin-associated genes and completely fail to  
30 remyelinate regenerated axons. We also show that both YAP and TAZ are redundantly required  
31 for optimal remyelination. These findings suggest that axons regulate transcriptional activity of  
32 YAP/TAZ in adult SCs and that YAP/TAZ are essential for functional regeneration of peripheral  
33 nerve.

34

## 35 INTRODUCTION

36 YAP (Yes-associated protein) and TAZ (Transcriptional coactivator with PDZ-binding motif),  
37 are paralogous transcription coactivators, chiefly known as potent stimulators of cellular  
38 proliferation in diverse developing (von Gise et al., 2012; Zhang et al., 2012; Xin et al., 2013;  
39 Cotton et al., 2017) and neoplastic (Yu et al., 2015; Zanconato et al., 2016; Moon et al., 2018)  
40 tissues. Consistent with this role, we and others have recently shown that YAP/TAZ promote  
41 vigorous proliferation of immature Schwann cells (SC) in developing peripheral nerves (Poitelon  
42 et al., 2016; Deng et al., 2017; Grove et al., 2017), and that overexpression of YAP/TAZ  
43 promotes abnormally excessive proliferation of mature SCs in adult peripheral nerves (Mindos et  
44 al., 2017; Wu et al., 2018). Unexpectedly, several groups demonstrated that YAP or YAP/TAZ  
45 promote differentiation of developing SCs by upregulating myelin-associated genes, thereby  
46 mediating developmental myelination (Fernando et al., 2016; Lopez-Anido et al., 2016; Poitelon  
47 et al., 2016; Deng et al., 2017; Grove et al., 2017). Our group additionally showed that  
48 YAP/TAZ are selectively expressed in differentiated myelin-forming SCs, and that they are  
49 required for maintenance of the myelin sheath in adult nerves (Grove et al., 2017). In many  
50 systems, YAP/TAZ shift to the cytoplasm concomitant with differentiation of developing cells,  
51 and the nuclear exclusion of YAP/TAZ is believed to be required for homeostatic maintenance of  
52 mature cells or tissues (Varelas, 2014; Wang et al., 2018). We were therefore intrigued to find  
53 that YAP/TAZ are nuclear and transcriptionally active in mature SCs maintaining peripheral  
54 myelination.

55

56 Building on these findings in developing and intact adult nerves, we now report on the role of  
57 YAP/TAZ in the regenerating nerve, in which SCs both proliferate and differentiate, as in  
58 developing peripheral nerve. Following traumatic nerve injury, SCs in axotomized nerve rapidly  
59 dedifferentiate and proliferate as they convert to regeneration promoting “repair” SCs (Jessen  
60 and Mirsky, 2016; Tricaud and Park, 2017). When repair SCs regain axon contacts, they re-  
61 differentiate to myelin-forming SCs, thereby restoring motor and sensory functions (Fex  
62 Svennigsen and Dahlin, 2013; Stassart et al., 2013). Strikingly, we found that YAP/TAZ  
63 disappear from denervated SCs but reappear in SCs as axons regenerate. Consistent with these  
64 observations, we found that YAP/TAZ are dispensable for SC proliferation after injury but  
65 required for remyelination of regenerated axons. These findings extend the role of YAP/TAZ to

66 functional regeneration of injured nerves and suggest that SCs are dependent on axons for their  
67 transcriptional activity of YAP/TAZ.

68

## 69 **RESULTS**

70

### 71 **YAP/TAZ expression in Schwann cells is axon-dependent**

72 Transcriptional regulation of SC proliferation and differentiation by YAP/TAZ depends on their  
73 nuclear localization. Nuclear YAP/TAZ in SCs of adult mice promote myelin gene expression,  
74 essentially maintaining peripheral nerve myelination (Grove et al., 2017). As the first step to  
75 determine the roles of YAP/TAZ in nerve repair, we examined spatiotemporal expression  
76 patterns of YAP/TAZ in adult mice after sciatic nerve crush injury (Figure 1). The nerve crush  
77 model evokes active axon degeneration in the distal nerve stump, while permitting new axons  
78 from the proximal nerve stump to regenerate through the crushed site within 1-2 days post injury  
79 (dpi) (Kang and Lichtman, 2013; Jang et al., 2016; Frenzo et al., 2019). New axons then keep  
80 regenerating within the basal lamina tubes filled with SCs and their processes, at the speed of 1-4  
81 mm/day, although the debris of degenerating axons and myelin is not yet completely removed.  
82 We killed these mice 1, 3, 6, 9, 12, and 24 dpi and immunostained proximal and distal nerve  
83 stumps of ~5 mm in length with an antibody specific for both YAP and TAZ (Figure 1A; at 12  
84 dpi). At 1 dpi when distal axons remained largely intact, nuclear expression of YAP/TAZ in  
85 associated SCs was unchanged (Figure 1B; 1D-dstl). Strikingly, at 3 dpi when axon degeneration  
86 was robust and SCs lost axon contacts, YAP/TAZ were almost undetectable in SC nuclei (Figure  
87 1B; 3D-dstl). Thus, SCs lose nuclear expression of YAP/TAZ as associated axons degenerate.

88

89 YAP/TAZ reappeared in the nuclei of SCs at 6 dpi, and these SCs were associated with  
90 regenerating axons (Figure 1B; 6D-dstl). By 12 dpi, as axon regeneration and maturation  
91 progressed further, more SCs exhibited strong nuclear expression of YAP/TAZ, comparable to  
92 that of SCs in the proximal nerve stumps (Figure 1B; 12D-dstl, see also Figure 1A). These  
93 observations suggest that SCs upregulate nuclear YAP/TAZ, when they regain axon contacts as  
94 axons regenerate.

95

96 Notably, we frequently observed thin regenerating axons associated with SCs at 3dpi, but  
97 YAP/TAZ were undetectable in these SCs (Figure 1B; zoomed area of 3D-dstl). In contrast, SCs  
98 exhibiting strong YAP/TAZ at 6- and 12 dpi were associated with thick axons, which appeared  
99 large enough to be myelinated (i.e.,  $1 > \mu\text{m}$ ; Figure 1B; 6D-dstl, zoomed area of 12D-dstl). These  
100 observations suggest that YAP/TAZ are selectively upregulated in SCs associated with  
101 regenerating axons that have become large enough to be myelinated. Consistent with this notion,  
102 YAP/TAZ are expressed in myelinating, but not in non-myelinating, SCs (Grove et al., 2017).

103

104 Western blotting also revealed marked reduction of YAP and TAZ levels at 3 dpi, followed by  
105 rapid upregulation of TAZ levels (Figure 1C, Figure 1-source data 2). Notably, YAP levels  
106 remained low in nerve lysates at 12 dpi (Figure 1C). As cells other than SCs can affect overall  
107 YAP levels (Gaudet et al., 2011; Stierli et al., 2018), we next examined expression of YAP in  
108 SCs of crushed nerves by immunohistochemistry (IHC). We first verified that an antibody  
109 specifically recognized YAP, but not TAZ (Figure 1-figure supplement 1A). YAP is upregulated  
110 in many SC nuclei at 6 dpi and continues to be observed at 24 dpi (Figure 1-figure supplement  
111 1B), demonstrating that YAP is also upregulated in SCs concomitant with axon regeneration.

112

113 The dramatic down- and upregulation of YAP/TAZ concurrent with axon degeneration and  
114 regeneration, respectively, suggest that SCs are dependent on axons for YAP/TAZ nuclear  
115 expression. To test further whether axons regulate YAP/TAZ expression in mature SCs, we next  
116 investigated if denervated SCs are capable of upregulating YAP/TAZ in the absence of  
117 regenerating axons. We used a nerve transection injury model in which we completely cut one  
118 sciatic nerve and tied both ends of the transected nerve to prevent axon regeneration from  
119 proximal to distal nerve stumps. We examined these mice at 1, 3, 6, 9, 12, and 24 dpi. We first  
120 confirmed absence of regenerating axons in distal nerve stumps of these mice and found that  
121 YAP/TAZ become undetectable in SCs at 3 dpi (Figure 2B; 3D-dstl), concurrent with robust  
122 axon degeneration as observed after nerve crush injury. Notably, nuclear YAP/TAZ continued to  
123 be undetectable in SCs after 3 dpi (Figure 2B; e.g., 12D-dstl, see also Figure 2A), demonstrating  
124 that axons are required for YAP/TAZ upregulation in denervated SCs.

125

126 We also used an antibody specific for transcriptionally inactive, phosphorylated YAP (p-YAP),  
127 which is located preferentially in cytoplasm and exhibits perinuclear and membrane  
128 accumulation (Grove et al., 2017). We found that p-YAP became undetectable in SCs of  
129 transected/tied nerves by 12 dpi (Figure 2C). In contrast, p-YAP expression recovered in SCs of  
130 crushed nerves at 12 dpi (Figure 2D). These findings suggest that SCs are dependent on axons  
131 for both nuclear and cytoplasmic expression of YAP/TAZ.

132

### 133 **YAP/TAZ are dispensable for Schwann cell proliferation after nerve injury**

134 SCs rapidly dedifferentiate and convert to repair SCs after nerve injury. During this  
135 transdifferentiation process, SCs begin to proliferate ~3 dpi (Clemence et al., 1989; Jessen and  
136 Mirsky, 2016; Tricaud and Park, 2017). Our observation that YAP/TAZ disappear in SCs by 3  
137 days after axotomy raises the interesting possibility that YAP/TAZ are not involved in injury-  
138 elicited SC proliferation. Alternatively, levels of YAP/TAZ that are too low to be detected by  
139 IHC may be sufficient to promote transcription of the genes activating SC proliferation. To test  
140 these possibilities, we used an inducible knockout mouse (*Plp1-creERT2; Yap<sup>fl/fl</sup>; Taz<sup>fl/fl</sup>*,  
141 hereafter Yap/Taz iDKO) to inactivate YAP/TAZ selectively in SCs after nerve injury. We  
142 induced recombination at 6 weeks of age, completely transected and tied the sciatic nerve in one  
143 leg, killed the mice 5 days later when SCs actively proliferate, and compared SC proliferation in  
144 intact and transected nerves of WT and iDKO mice (Figure 3A, n=3 mice per genotype). We first  
145 confirmed efficient ablation of YAP/TAZ in SCs by analyzing contralateral, intact nerves of  
146 iDKO mice (Figure 3B, 3F). We excluded mice with poor deletion (i.e., exhibiting YAP/TAZ in  
147 >20% SCs) from further analysis. Notably, pulse labeling with EdU indicated that the transected  
148 nerves of WT and iDKO contained similar numbers of dividing SCs in S phase (Figure 3C, 3G).  
149 Numbers of Ki67+ proliferating SCs (Figure 3D, 3H) and of total SCs (Figure 3E, 3I) were also  
150 similar in the transected nerves of WT and iDKO.

151

152 If adult SCs lacking YAP/TAZ in iDKO die or proliferate independently of axotomy, our  
153 analysis of injury-elicited SC proliferation might be confounded. To exclude this possibility, we  
154 examined contralateral, intact nerves of WT and iDKO mice at 12 dpi for SC proliferation and  
155 death (Figure 3-figure supplement 1A). Contralateral iDKO nerves contained neither EdU+ SCs  
156 (Figure 3-figure supplement 1B) nor apoptotic SCs, as assessed by TUNEL assays (Figure 3-

157 figure supplement 1C). We also found that SC numbers did not differ significantly from those in  
158 intact nerves of WT mice (Figure 3-figure supplement 1D, 1E). Collectively, these results  
159 strongly indicate that YAP/TAZ do not regulate SC proliferation after nerve injury.

160

### 161 **SCs lacking YAP/TAZ convert to repair SCs and support axon regeneration**

162 Next, we investigated if transdifferentiation to repair SCs proceeds normally in iDKO nerves  
163 after injury. We first examined expression of c-Jun, phosphorylated c-Jun (pc-Jun), p75 and Oct-  
164 6, which are associated with formation of repair SCs during nerve regeneration (Scherer et al.,  
165 1994; Parkinson et al., 2008; Arthur-Farraj et al., 2012; Fontana et al., 2012). Repair SC  
166 formation principally depends on the upregulation of c-Jun, which promotes expression of  
167 regeneration-associated genes (RAG), such as p75 neurotrophin receptor (NTR) (Parkinson et al.,  
168 2008; Arthur-Farraj et al., 2012; Fontana et al., 2012). Immunohistochemical analysis of  
169 transected sciatic nerves at 5 dpi showed that cJun, pc-Jun, p75 NTR and Oct-6 were all  
170 upregulated in denervated SCs of iDKO mice after nerve injury, as in WT mice (Figure 4, Figure  
171 4-figure supplement 1 and Figure 4-source data 3). Notably, injured nerves of WT and iDKO  
172 mice contained similar numbers of SCs expressing c-Jun (Figure 4A, 4E) and active pc-Jun  
173 (Figure 4B, 4F). There was minimal expression of c-Jun in contralateral, intact nerves of iDKO  
174 at 5 dpi (Figure 4-figure supplement 1). p75 NTR expression was also strongly upregulated in  
175 iDKO SCs, as in WT SCs (Figure 4C, 4G), and Oct-6 expression in WT and iDKO SCs did not  
176 differ (Figure 4D, 4H). Western blotting analysis confirmed upregulation of these proteins in  
177 injured nerves and validated the specificity of the antibodies used in the immunohistochemical  
178 analysis (Figure 4-figure supplement 1 and Figure 4-source data 3).

179

180 SCs are essential for successful nerve regeneration (Scheib and Hoke, 2013; Jessen and Mirsky,  
181 2016). As the definitive test of whether iDKO SCs convert normally to repair SCs, we next  
182 examined if the absence of YAP/TAZ in SCs impairs nerve regeneration. Because *Yap/Taz*  
183 iDKO mice die ~14 days after tamoxifen treatment (Grove et al., 2017), we crushed sciatic  
184 nerves and analyzed them on 12-13 dpi. To minimize variability, we crushed nerves at the same  
185 site close to the sciatic notch and analyzed nerve segments immunohistochemically or  
186 ultrastructurally at the same distance distal to the injury (Figure 5A). An anti- $\beta$ 3 tubulin antibody,  
187 which identifies all axons, intensely labeled many axons that had regenerated through the ~10

188 mm long distal nerve stumps of iDKO mice (Figure 5B, 5D). These axons were as thick and  
189 numerous in iDKO as in WT nerves (Figure 5B, 5F, see also Figure 7-figure supplement 1).  
190 Similar numbers of axons were also present in contralateral intact nerves of WT and iDKO  
191 (Figure 7-figure supplement 1), indicating that there was no axon degeneration in intact nerves of  
192 iDKO at 12-13 dpi.

193

194 To confirm these findings, we examined transverse nerve segments 5 mm distal to the injury by  
195 TEM (Transmission Electron Microscopy). In this ultrastructural analysis, we took advantage of  
196 the fact that regenerating axons extend through the basal lamina (BL) tubes that surround SCs  
197 and their processes (Scheib and Hoke, 2013; Jessen and Mirsky, 2016). We found that the  
198 percentage of BL tubes containing axons (single or multiple) was similar in WT and iDKO  
199 nerves (Figure 5E, 5G). Furthermore, the percentage of BL tubes containing axons large enough  
200 to be myelinated (i.e.,  $>1\mu\text{m}$ ) did not differ (Figure 5H). However, the large axons in iDKO  
201 nerves were more frequently accompanied by one or multiple, often thin, axons, which  
202 presumably represent transient collateral sprouts (Figure 5E-d, 5I).

203

204 Next, we examined iDKO nerves at an earlier time point after injury to investigate if axon  
205 regeneration might be delayed in the absence of YAP/TAZ in SCs. We analyzed longitudinal  
206 sections of crushed sciatic nerves from WT and iDKO mice at 3 dpi (Figure 6; n=3 mice per  
207 genotype). Because abundant debris of degenerating axons often confounded  
208 immunohistochemical identification of regenerating axons at this early time point, we selectively  
209 labeled regenerating axons with an antibody for superior cervical ganglion 10 (SCG10), which is  
210 rapidly and preferentially upregulated in sensory axons after injury (Shin et al., 2014; Mogha et  
211 al., 2016). Numerous axons reached ~4mm distal to the crush site in iDKO, as in WT mice  
212 (Figure 6A, B). There was no significant difference in axon density measured 2 mm distal to the  
213 crush (Figure 6C-E), nor in the length of the longest axons (Figure 6F). Taken together, these  
214 results show that SCs lacking YAP/TAZ convert normally to repair SCs and support axon  
215 regeneration after injury.

216

217 **YAP/TAZ are required for Schwann cells to remyelinate axons**



218 We have previously reported that developing SCs lacking YAP/TAZ arrest as promyelinating  
219 SCs, and are therefore unable to initiate myelin formation (Grove et al., 2017). To determine if  
220 adult SCs lacking YAP/TAZ can myelinate regenerating axons, we next analyzed the extent of  
221 myelination in the same iDKO nerves analyzed for axon regeneration on 12-13 dpi (Figure 7A  
222 shows the same nerves as Figure 5B). As expected, there was strong expression of myelin basic  
223 protein (MBP), a major structural component of the myelin sheath, in the crushed nerves of WT  
224 mice (Figure 7A, 7B). MBP immunoreactivity was also abundant in the contralateral, intact  
225 nerves of iDKO mice (Figure 7A; bottom panel), in which our previous ultrastructural analysis  
226 found segmental demyelination (Grove et al., 2017). In contrast, iDKO crushed nerves revealed  
227 remarkably little, if any, MBP immunoreactivity (Figure 7A, 7C, see also Figure 7-figure  
228 supplement 1 for higher magnification images). Consistent with this immunohistochemical  
229 analysis, semithin (Figure 7D) and ultrathin sections processed for EM (Figure 5E, 7E) contained  
230 many myelinated axons in WT but almost none in iDKO crushed nerves (Figure 7F, 7G).  
231 Moreover, iDKO SCs frequently surrounded and established a 1:1 relationship with large axons,  
232 but none of these axons exhibited a myelin sheath (Figure 5E, 7E). These findings suggest that  
233 adult SCs lacking YAP/TAZ fail to remyelinate axons because they arrest at the promyelinating  
234 stage after injury.

235

### 236 **YAP and TAZ are functionally redundant and required for optimal remyelination**

237 Mindos et al. recently reported that expression of YAP, assessed by Western blotting, selectively  
238 increases after nerve injury in mutant nerves lacking Merlin in SCs, but not in WT nerves,  
239 whereas TAZ increases in both WT and mutant nerves (Mindos et al., 2017). They also reported  
240 that elevated YAP levels prevent axon regeneration and remyelination, and that inactivation of  
241 YAP alone is sufficient to restore full functional recovery of the Merlin mutants (Mindos et al.,  
242 2017). These observations suggest that the function of TAZ in adult SCs may differ from that of  
243 YAP. We next examined axon regeneration and remyelination when SCs express YAP but not  
244 TAZ after injury. We reasoned that, if YAP prevents regeneration, regardless of expression  
245 levels (see Discussion), and if it differs functionally from TAZ, then we would find axon  
246 regeneration and remyelination to be poor.

247

248 Using a TAZ-selective tamoxifen inducible line to inactivate TAZ in SCs (*Plp1-creERT2; Yap<sup>+/+</sup>*;  
249 *Taz<sup>fl/fl</sup>*, hereafter *Taz* iKO), we crushed sciatic nerves unilaterally and compared the mutants to  
250 WT and *Yap/Taz* iDKO mice at 12 dpi. We first confirmed efficient ablation of TAZ and no  
251 compensatory elevation of YAP levels in *Taz* iKO (Figure 8A, Figure 8-source data 4). We then  
252 used anti- $\beta$ 3 tubulin antibody to assess axon regeneration up to 15 mm distal to the crushed site  
253 (Figure 8-figure supplement 1A, B). We found that regenerating axons were as thick and  
254 numerous in *Taz* iKO, as in WT mice (Figure 8-figure supplement 1C, D). Axon density  
255 measured at 8~10 mm distal to the crush site showed no significant difference among WT, *Taz*  
256 iKO and *Yap/Taz* iDKO nerves (Figure 8B, Figure 8-figure supplement 1E).

257

258 Ultrastructural analysis of nerve segments at 5 mm distal to the injury revealed many BL tubes  
259 containing single or multiple axons in *Taz* iKO, as in WT (Figure 8C). These axon-containing  
260 BL tubes were as numerous in iKO as in WT and iDKO (Figure 8D). Counts of BL tubes  
261 containing axons large enough to be myelinated also did not differ (Figure 8E). Taken together,  
262 these results show that axons regenerated as robustly in *Taz* iKO as in WT and iDKO nerves,  
263 indicating that SCs expressing only YAP supported axon regeneration.

264

265 We also found that, whereas iDKO nerves contained no myelinated axons (e.g., Figure 7D),  
266 myelinated axons were frequent in *Taz* iKO nerves (Figure 8C, 8F), and G-ratios did not differ in  
267 *Taz* iKO and WT (Figure 8G), demonstrating that SCs expressing only YAP were capable of  
268 myelinating regenerated axons. Notably, however, a significantly smaller percentage of single  
269 axons were myelinated in *Taz* iKO than in WT (Figure 8F), indicating that remyelination is less  
270 advanced in *Taz* iKO nerves whose SCs express only YAP. Taken together, these results show  
271 that YAP, at normal levels (see Discussion), does not prevent axon regeneration or remyelination  
272 after injury, and that both YAP and TAZ are required for optimal remyelination.

273

#### 274 **Redifferentiation of Schwann cells lacking YAP/TAZ**

275 Following axon regeneration, denervated SCs that have regained axon contacts downregulate  
276 dedifferentiation-associated genes while upregulating genes promoting their differentiation  
277 (Stassart et al., 2013; Quintes et al., 2016; Wu et al., 2016). It is possible that YAP/TAZ-  
278 deficient iDKO SCs fail to myelinate regenerated axons because their capacity to carry out one

279 or both processes is defective. To test if iDKO SCs correctly downregulate dedifferentiation-  
280 associated genes, we compared expression of c-Jun, Ki67 and Oct-6 by WT and iDKO SCs at 5  
281 and 12 dpi after crush. The number of c-Jun<sup>+</sup> SCs was markedly, but similarly, reduced in nerves  
282 of both WT and iDKO at 12 dpi (Figure 9A, E), and proliferating SCs were rare (Figure 9B, F).  
283 Oct-6 expression was also reduced in both WT and iDKO (Figure 9C, G), although it remained  
284 statistically higher in iDKO SCs. These results suggest that iDKO SCs are capable of  
285 downregulating dedifferentiation genes and withdraw gradually from dedifferentiation as like  
286 WT SCs.

287  
288 Lastly, we examined expression of Krox 20 (also known as Egr2), the master transcription factor  
289 that drives myelin gene expression (Topilko et al., 1994; Decker et al., 2006). Notably, whereas  
290 WT SCs upregulated Krox 20 expression at 12 dpi, concomitant with remyelination, few if any  
291 iDKO SCs exhibited Krox 20 immunoreactivity (Figure 9D, H). These results suggest that iDKO  
292 SCs fail to myelinate regenerated axons at least in part due to failure to upregulate Krox 20.

## 293 294 **DISCUSSION**

295 Recent studies of SC-specific gene targeting consistently show that SCs lacking both YAP and  
296 TAZ are unable to proliferate properly and fail to myelinate developing peripheral nerves  
297 (Poitelon et al., 2016; Deng et al., 2017; Grove et al., 2017). It remains controversial, however,  
298 how YAP/TAZ loss results in complete amyelination of developing nerves and whether  
299 YAP/TAZ also play a role in myelin maintenance of adult nerves. Indeed, Poitelon et al.,  
300 attributed developmental amyelination to the inability of immature SCs lacking YAP/TAZ to  
301 wrap around developing axons, a process called radial sorting (Feltri et al., 2016; Poitelon et al.,  
302 2016). In contrast, Grove et al. and Deng et al. attributed the myelination failure primarily to the  
303 inability of SCs to differentiate into myelinating SCs (Deng et al., 2017; Grove et al., 2017).  
304 Deng et al., however, disagreed with our view about the role of YAP/TAZ in myelin  
305 maintenance of adult nerves (Deng et al., 2017; Grove et al., 2017). These disagreements  
306 motivated the present study, which investigated YAP/TAZ expression in adult SCs after nerve  
307 injury and their contribution to nerve regeneration. We found that YAP/TAZ dramatically  
308 disappear and reappear in SCs after nerve injury, and this loss and recovery of YAP/TAZ in SCs  
309 are spatiotemporally correlated with degeneration and regeneration of axons. We also found that

310 SCs lacking YAP/TAZ proliferate and wrap around regenerated axons normally, but then fail to  
311 remyelinate them. These findings have several important implications for YAP/TAZ function in  
312 mature SCs.

313

314 Using antibodies specifically immunolabeling YAP or YAP/TAZ, we found dramatic down- and  
315 upregulation of both nuclear and cytoplasmic YAP/TAZ in SCs after nerve injury.

316 Immunohistochemical identification of SC-selective YAP/TAZ was essential for detecting  
317 spatiotemporal regulation of YAP/TAZ. Indeed, we were only able to detect YAP/TAZ  
318 downregulation on Western blots when we used lysates prepared from nerves extensively  
319 perfused with saline, and from which the epi- and perineurium had been carefully removed. This  
320 procedure probably succeeded because it minimized the amount of YAP/TAZ present in cells  
321 other than SCs. Careful attention to YAP/TAZ expression in cells other than SCs will help to  
322 resolve inconsistencies in earlier studies of YAP/TAZ expression in peripheral nerve.

323

324 YAP/TAZ are located in the nuclei of developing SCs, where they promote proliferation and  
325 differentiation (Poitelon et al., 2016; Deng et al., 2017; Grove et al., 2017). They are also nuclear  
326 in adult SCs that maintain the myelin sheath (Grove et al., 2017) and that proliferate abnormally  
327 (Wu et al., 2018). It was therefore particularly intriguing to find that YAP/TAZ become  
328 undetectable in denervated SCs and that SCs lacking YAP/TAZ proliferate normally. YAP/TAZ  
329 disappeared from SCs, upon axon degeneration in both crushed and transected nerves. They  
330 reappeared in SCs in crushed nerve concomitant with regenerating axons, but not in transected  
331 nerve lacking axons, suggesting that YAP/TAZ expression in SCs is dependent on axons. It is  
332 also notable that YAP/TAZ appeared unchanged at 1 dpi, but had dramatically disappeared at 3  
333 dpi, when axon degeneration was well underway (Beirowski et al., 2005; Gomez-Sanchez et al.,  
334 2015; Jang et al., 2016) and denervated SCs had lost contact with axons. Furthermore, SCs that  
335 upregulated YAP/TAZ after 3 dpi were associated with regenerating axons large enough to be  
336 myelinated. These results are in consistent with our earlier findings of selective expression of  
337 YAP/TAZ in myelin-forming SCs (Grove et al., 2017), implying that direct SC-axon contact  
338 probably regulate YAP/TAZ down- and upregulation after nerve injury.

339

340 We were surprised to find that SC proliferation proceeds normally in *Yap/Taz* iDKO nerves after  
341 injury. Proliferation of mature SCs after injury is therefore due to a YAP/TAZ-independent  
342 mechanism, in contrast to the proliferation of developing SCs, which is markedly reduced by  
343 YAP/TAZ inactivation (Clemence et al., 1989; Grove et al., 2017). This result is consistent with  
344 the notion that the mechanism for SC proliferation during development differs from that for  
345 proliferation after injury (Atanasoski et al., 2001; Atanasoski et al., 2008). However, our finding  
346 does not indicate that YAP/TAZ are unable to stimulate proliferation of mature SCs. Abnormally  
347 high levels of YAP have been shown to elicit excessive SC proliferation in Merlin mutants after  
348 nerve injury (Mindos et al., 2017), and YAP/TAZ overexpression induced by LATS1/2  
349 inactivation has been shown to induce tumorigenic SC proliferation in adult nerves (Wu et al.,  
350 2018). These observations, together with our own, indicate that YAP/TAZ are not normally  
351 involved in injury-elicited SC proliferation, but that, if abnormally overexpressed, they can  
352 stimulate vigorous SC proliferation. It is also noteworthy that YAP/TAZ inactivation markedly  
353 reduces, but does not completely prevent, proliferation of developing SCs (Deng et al., 2017;  
354 Grove et al., 2017). We suggest, therefore, that YAP/TAZ are potent stimulants of SC  
355 proliferation, but not an absolute requirement.

356  
357 Tumorigenic proliferation of adult SCs associated with abnormally increased YAP/TAZ levels  
358 (Wu et al., 2018) suggests the importance of maintaining proper levels of YAP/TAZ, but it does  
359 not explain why YAP/TAZ are almost completely lost, rather than reduced, in denervated SCs.  
360 We previously demonstrated that inducible deletion of YAP/TAZ elicits SC demyelination in  
361 adult intact nerve (Grove et al., 2017). If YAP/TAZ indeed maintain myelination and act by  
362 promoting transcription of *Krox20* and other myelin genes, then sustaining YAP/TAZ would  
363 counteract demyelination and dedifferentiation of SCs after injury. Conversely, their absence  
364 would promote downregulation of myelin genes, facilitating demyelination and formation of  
365 repair SCs. In accordance with these ideas, transcription of *Krox 20* and other myelin genes  
366 remains robust in SCs up until 2 dpi, but is downregulated by 3 dpi (Arthur-Farraj et al., 2017),  
367 when we observed dramatic disappearance of YAP/TAZ. This timing suggests that YAP/TAZ  
368 protein downregulation leads to *Krox 20* mRNA downregulation, suppressing expression of  
369 myelin proteins in de-differentiating Schwann cells. Complete loss of both nuclear and  
370 cytoplasmic YAP/TAZ could therefore imply that active regulatory mechanisms completely

371 inactivate YAP/TAZ after injury. In support of this notion, in mutant mice lacking Merlin, YAP  
372 is abnormally upregulated in SCs after nerve injury, impairing SC de-differentiation (Mindos et  
373 al., 2017). This YAP upregulation suggests that one role of Merlin is to downregulate YAP in  
374 SCs and that YAP/TAZ expression in SCs is likely under active, presumably axon-dependent,  
375 regulation in both intact and injured mature nerves. This postulation of axon-dependent  
376 regulation of YAP/TAZ emphasizes that YAP/TAZ play a passive role in Wallerian degeneration,  
377 predicting that SCs do not require YAP/TAZ to dedifferentiate, proliferate, or transdifferentiate  
378 to repair SCs. Indeed, we found that these processes proceed normally in *Yap/Taz* iDKO mice.  
379  
380 iDKO SCs are capable of wrapping around large diameter single axons but fail to initiate  
381 remyelination, which recapitulates the developmental phenotype of these mutant mice (Deng et  
382 al., 2017; Grove et al., 2017). For at least two reasons remyelination failure is highly unlikely to  
383 be due to poor physiological conditions of iDKO mice that die ~14 days after injury. First, axons  
384 regenerate normally in iDKO, which is unlikely if SCs are selectively vulnerable to poor  
385 physiological condition. Furthermore, iDKO SCs proliferate and trans-differentiate to repair-SCs  
386 normally. iDKO SCs also downregulate c-Jun to prepare for remyelination, whereas they  
387 maintain a higher level of Oct 6 than WT SCs, consistent with the failure of iDKO SCs to  
388 upregulate Krox 20 and MBP. Second, iDKO SCs wrap around individual axons, but fail to  
389 myelinate them, indicating that they proceed to the promyelination stage but no further.  
390 Therefore, one would have to postulate that the poor physiological condition of iDKO mice has a  
391 very specific effect on a particular remyelination stage, which we find unlikely.  
392  
393 iDKO SCs fail to upregulate Krox 20. Krox 20 is widely accepted as the key transcription factor  
394 promoting peripheral myelination. This is largely believed to be the case after injury (Brugger et  
395 al., 2017), although its role in remyelination has never been explicitly demonstrated. Other  
396 pathways can also promote upregulation of certain myelin proteins and lipids independently of  
397 Krox 20 (Domenech-Estevéz et al., 2016), and numerous other factors, both positive and  
398 negative regulators, mediate peripheral myelination (Jessen and Mirsky, 2008; Herbert and  
399 Monk, 2017). Therefore, it is conceivable that the lack of Krox 20 in iDKO is a consequence  
400 rather than a cause of impaired remyelination. However, several considerations make it highly  
401 unlikely. First, we and others demonstrated that YAP/TAZ-TEAD1 complex directly binds to the

402 cis-acting regulatory sequence of Krox 20 designated as the Myelinating Schwann cell Element  
403 (MSE) to upregulate Krox 20 during developmental myelination (Lopez-Anido et al., 2016;  
404 Grove et al., 2017). Second, we showed that YAP/TAZ-TEAD1 also bind to Krox 20 MSE in  
405 adult nerve, suggesting direct regulation of Krox 20 by YAP/TAZ in mature SCs (Grove et al.,  
406 2017). Third, Oct 6, which induces upregulation of Krox 20, together with other TFs, is  
407 upregulated in iDKO after nerve injury, as in WT (Figure 4H, 9G). This finding suggests that  
408 remyelination in iDKO is blocked at the step of Krox 20 upregulation. Indeed, we and others  
409 have shown that iDKO SCs are arrested at the promyelination stage during development (Deng  
410 et al., 2017; Grove et al., 2017), and we found that, similarly after nerve injury, iDKO SCs  
411 proceed to the promyelination stage but fail to upregulate Krox 20 and initiate myelin formation.  
412

413 YAP upregulation in SCs lacking Merlin has recently been reported to decrease the regeneration-  
414 promoting ability of repair SCs, which prevents axon regeneration in Merlin mutants (Mindos et  
415 al., 2017). This study implicates YAP as an inhibitor of axon regeneration. Our study suggests  
416 that this inhibition is dose- and context-dependent. We observed that repair SCs rapidly  
417 upregulate both YAP and TAZ as axons regenerate and that expression persists as regeneration  
418 continues. We also found that axon regeneration is as robust in *Taz* iKO and *Yap/Taz* iDKO as in  
419 WT, but not noticeably enhanced. Given that YAP is not compensatorily upregulated in *Taz* iKO  
420 (Figure 8A), these results suggest that at least normal levels of YAP do not prevent axon  
421 regeneration. However, overly robust upregulation of YAP, presumably as in Merlin mutants  
422 (Mindos et al., 2017), may severely compromise axon regeneration because excessive levels of  
423 YAP/TAZ alter the growth-promoting ability of SCs and/or cause their tumorigenic proliferation.  
424

425 The present study, together with earlier work, strongly suggests that the levels of YAP/TAZ may  
426 be a critical determinant of their function in adult SCs. Optimal levels of YAP/TAZ promote  
427 myelin formation, maintenance and remyelination, whereas their absence promotes  
428 demyelination. In contrast, overly excessive levels of YAP/TAZ promote SC proliferation.  
429 Additional efforts to confirm this notion and to understand the presumably axon-dependent  
430 mechanisms that tightly regulate nuclear levels, thus transcriptional activity, of YAP/TAZ in SCs  
431 may generate new strategies for peripheral nerve repair.

432

433 **MATERIALS AND METHODS**

434

| Reagent type (species) or resource                | Designation                      | Source or Reference       | Identifiers                                 | Additional Information      |
|---------------------------------------------------|----------------------------------|---------------------------|---------------------------------------------|-----------------------------|
| Strain, strain background ( <i>Mus musculus</i> ) | C57Bl/6                          | Jackson Laboratory        | Stock #: 000664;<br>RRID:IMSR<br>JAX:000664 |                             |
| Genetic reagent ( <i>M. musculus</i> )            | <i>Plp1-Cre-ERT2</i>             |                           | MGI:2663093                                 | (Leone et al., 2003)        |
| Antibody                                          | anti-Yap/Taz (rabbit monoclonal) | Cell Signaling Technology | D24E4, #8418<br>RRID:AB_10950494            | IHC 1:200<br>Western 1:1000 |
| Antibody                                          | anti-SCG10 (rabbit monoclonal)   | Novus Biologicals         | NBP1-49461<br>RRID:AB_10011569              | IHC 1:5000                  |
| Antibody                                          | anti-Yap (rabbit monoclonal)     | Cell Signaling Technology | D8H1X, #14074<br>RRID:AB_2650491            | IHC 1:200                   |
| Antibody                                          | anti-Sox10 (goat polyclonal)     | R&D Systems               | #AF-2864<br>RRID:AB_442208                  | IHC 1:100                   |
| Antibody                                          | anti-Sox10 (rabbit monoclonal)   | Abcam                     | EPR4007,<br>#ab155279<br>RRID:AB_2650603    | IHC 1:250                   |



|          |                                            |                                                |                                       |             |
|----------|--------------------------------------------|------------------------------------------------|---------------------------------------|-------------|
| Antibody | anti-Egr2 (rabbit polyclonal)              | Professor Dies Meijer, University of Edinburgh |                                       | IHC 1:4000  |
| Antibody | anti-Oct6 (rabbit monoclonal)              | Abcam                                          | EP5421, #ab126746<br>RRID:AB_11130256 | WB 1:1000   |
| Antibody | anti-Oct6 (rabbit polyclonal)              | Abcam                                          | #ab31766<br>RRID:AB_776899            | IHC 1:800   |
| Antibody | anti-c-Jun (mouse monoclonal)              | BD Transduction Laboratories                   | #610326<br>RRID:AB_397716             | IHC 1:500   |
| Antibody | anti-c-Jun (rabbit monoclonal)             | Cell Signaling Technology                      | 60A8, #9165<br>RRID:AB_2130165        | WB 1:1000   |
| Antibody | anti-pS63-c-Jun (rabbit polyclonal)        | Cell Signaling Technology                      | #9261<br>RRID:AB_2130162              | IHC 1:100   |
| Antibody | anti-Ki67 (rabbit polyclonal)              | Abcam                                          | #ab15580<br>RRID:AB_443209            | IHC 1:200   |
| Antibody | anti-p75NGFR (goat polyclonal)             | Neuromics                                      | #GT15057<br>RRID:AB_2737189           | IHC 1:400   |
| Antibody | anti-Tubulin $\beta$ 3 (rabbit polyclonal) | Biolegend                                      | #802001<br>RRID:AB_2564645            | IHC 1:1000  |
| Antibody | IRDye-680 (goat anti-mouse)                | LI-COR                                         | #926-32220<br>RRID:AB_621840          | WB 1:15,000 |
| Antibody | HRP-Goat anti-mouse secondary antibody     | Jackson ImmunoResearch                         | #715-035-150<br>RRID:AB_2340770       | WB 1:12,000 |
| Antibody | HRP-Goat anti-rabbit secondary antibody    | Jackson ImmunoResearch                         | #115-055-062<br>RRID:AB_2338533       | WB 1:12,000 |

|                         |                                |               |           |  |
|-------------------------|--------------------------------|---------------|-----------|--|
| Chemical compound, drug | Araldite 6005                  | EMS           | #10920    |  |
| Chemical compound, drug | DDSA                           | EMS           | #13710    |  |
| Chemical compound, drug | DBP                            | EMS           | #13101    |  |
| Chemical compound, drug | BDMA                           | EMS           | #11400-25 |  |
| other                   | Coated grids (100 mesh)        | EMS           | #FF100-Cu |  |
| Chemical compound, drug | Osmium tetroxide (4% solution) | EMS           | #19170    |  |
| Chemical compound, drug | Lead nitrate                   | EMS           | #17900    |  |
| Chemical compound, drug | Sodium citrate                 | EMS           | #21140    |  |
| Chemical compound, drug | Uranyl acetate                 | EMS           | #22400    |  |
| Chemical compound, drug | Sodium borate                  | EMS           | #21130    |  |
| Chemical compound, drug | Toluidine blue                 | EMS           | #22050    |  |
| Chemical compound,      | Paraformaldehyde               | Sigma-Aldrich | #158127   |  |

|                         |                                   |                         |         |                     |
|-------------------------|-----------------------------------|-------------------------|---------|---------------------|
| drug                    |                                   |                         |         |                     |
| Commercial assay or kit | Click-It EdU Alexa Fluor 594 kit  | ThermoFisher Scientific | #C10339 |                     |
| Chemical compound, drug | EdU                               | ThermoFisher Scientific | #E10187 |                     |
| Chemical compound, drug | Tamoxifen                         | Sigma-Aldrich           | #T5648  |                     |
| other                   | DAPI stain                        | Invitrogen              | #D1306  | IHC 1:250           |
| Antibody                | Alexa 488, 568 or 647 secondaries | Jackson ImmunoResearch  |         | IHC 1:250 to 1:1000 |
| software, algorithm     | Image Studio Lite                 | LI-COR, Inc             |         |                     |
| software, algorithm     | Prism                             | GraphPad Software, Inc  |         |                     |
| software, algorithm     | Stata                             | StataCorp LP            |         | Mann-Whitney test   |

435

#### 436 **Animals**

437 All surgical procedures and animal maintenance complied with the National Institute of Health  
438 guidelines regarding the care and use of experimental animals and were approved by the  
439 Institutional Animal Care and Use Committee of Temple University, Philadelphia, PA, USA  
440 (Protocol 4920). Both male and female mice were used in all experiments, and were maintained  
441 on the C57BL/6 background. *Plp1-creERT2; Yap<sup>fl/fl</sup>; Taz<sup>fl/fl</sup>*, *Plp1-creERT2; Yap<sup>+/+</sup>; Taz<sup>fl/fl</sup>*, *Mpz-*  
442 *cre;Yap<sup>fl/fl</sup>* and *Mpz-cre; Taz<sup>fl/fl</sup>* mice used in this study were generated and genotyped as  
443 described previously (Grove et al., 2017). C57BL/6 mice were used for immunohistochemical  
444 analysis of YAP/TAZ.

445

#### 446 **Tamoxifen administration**

447 Tamoxifen was injected into 6-8 week old *Yap/Taz* iDKO or *Taz* iKO mice as previously  
448 described (Grove and Brophy, 2014). A 10 mg/ml solution of tamoxifen was made in 10:1  
449 sunflower oil: 100% ethanol. This solution was injected intraperitoneally at a concentration of 0.2  
450 mg/g body weight. Injection was once daily for 5 days, followed by a 2 day break, then once  
451 daily for 5 consecutive days.

452

### 453 **Nerve crush or transection**

454 Sciatic nerves of right hindlimbs were crushed or transected 24 h after the final tamoxifen  
455 injection, using standard protocols (Son and Thompson, 1995). Briefly, a small skin incision was  
456 made in the posterior thigh and calf of the animals anesthetized by isoflurane. For crush, the  
457 sciatic nerve was crushed with a fine forceps (#5) for 10 seconds (3X) adjacent to the sciatic  
458 notch. The crush site was marked using charcoal-coated forceps, and the wound was closed. For  
459 transection, the exposed sciatic nerve was ligated at two directly adjacent sites, then cut with  
460 iridectomy scissors between the ligated sites. Ligated proximal and distal nerve endings were  
461 then sewn to adjacent muscle to prevent regeneration of axons from the proximal to distal nerve  
462 stumps. To identify proliferating Schwann cells, we intraperitoneally injected EdU (80 µg/g)  
463 eighty minutes before killing mice, as previously described (Grove et al., 2017).

464

### 465 **Western blotting**

466 Mice were perfused with PBS, sciatic nerves removed, and epineurium and perineurium  
467 carefully stripped from the nerves. Western blotting followed the same procedure described  
468 previously (Grove et al., 2017), except for IRDye 680RD goat anti-mouse IgG (LiCor #926-  
469 68070; 1:5,000). Image Studio Lite (LI-COR Biosciences) was used for quantifying protein  
470 expression.

471

### 472 **Immunohistochemistry**

473 Sciatic nerves were removed, and immediately fixed in 4% paraformaldehyde in PBS for 1 hour  
474 on ice. Nerves were washed 3 times in PBS, then stored in 15% sucrose in PBS overnight at 4°C  
475 for cryoprotection. Nerves were frozen-embedded in cryoprotectant medium (Thermo Fisher  
476 Scientific, Waltham, MA) in isomethylbutane at -80°C. 7-10 µm sections from the nerves were  
477 cut using a cryostat (Leica Microsystems, Germany) and collected directly onto glass slides. For

478 immunolabeling, nerve sections were rehydrated in PBS, permeabilized in 0.5% Triton/PBS for  
479 20 min, washed with PBS, then blocked in 2% bovine serum albumin (BSA) in PBS for 1hr.  
480 Sections were incubated with primary antibodies in blocking buffer overnight at 4°C in a  
481 hydrated chamber, washed with PBS, and incubated with secondary antibodies in blocking buffer  
482 for 2hrs at room temperature. Sections were washed with PBS, stained with DAPI for 10 min,  
483 and mounted with Vectashield mounting medium (Vector Labs, Burlingame, CA). Nerve  
484 sections were incubated with antibodies previously described (Grove et al., 2017), except for the  
485 following: rabbit anti-Krox20 (kind gift from Professor Dies Meijer, Edinburgh, UK; 1:4000),  
486 rabbit anti-Yap (Cell Signaling #14074; 1:200), rabbit anti-SCG10 (Novus Biologicals #49461;  
487 1:5000), goat anti-Sox10 (Santa Cruz #sc-17342; 1:200), goat anti-Sox10 (R&D Systems #AF-  
488 2864; 1:100), goat anti-p75 (Neuromics #GT15057; 1:400), rabbit anti-Ki67 (Abcam #ab15580;  
489 1:1000), mouse anti-Tubulin  $\beta$ 3 (clone Tuj1, Covance #MMS-435P; 1:1000), mouse anti-cJun  
490 (BD Biosciences #610326; 1:500), rabbit anti-cJun (CST #9165; 1:500), rabbit anti-phospho-  
491 cJun (CST #9261; 1:100).

492

### 493 **Electron microscopy, histology and morphometry**

494 Sciatic nerves were removed and immediately fixed in EM buffer, as previously described  
495 (Grove et al., 2017). After nerve crush or transection, a 5 mm piece of the nerve was taken  
496 immediately distal to the injury site. The proximal end of the section was nicked with a razor  
497 blade for orientation during embedding. Fixation was for 2 h at room temperature, followed by  
498 overnight at 4°C, with rotation. Post-fixation processing, embedding, cutting, staining and image  
499 capture were as previously described. For crushed or transected nerves, 500 nm semi-thin and 70  
500 nm ultra-thin transverse sections were cut from the segment 5 mm distal to the crush/transection  
501 site.

502

503 For analysis of axon regeneration and remyelination, 7500x TEM sections were examined. This  
504 magnification allowed unambiguous identification of basal lamina tubes through which axons  
505 regenerate. Multiple non-overlapping images were taken for each section, such that all regions of  
506 each section were sampled. Image J was used for image analysis. After counting the total number  
507 of basal lamina (BL) tubes per image, we next counted the number of BL tubes in the following  
508 categories: contains no axon(s); contains axon(s); contains at least 1 axon > 1  $\mu$ m in diameter;

509 contains a single axon  $> 1\mu\text{m}$  in diameter; contains a myelinated axon. This procedure enabled  
510 us to calculate the percentage of BL tubes in each category. Using an ImageJ G-ratio calculator  
511 plug-in, G ratios for each genotype were calculated in 2 different ways: (1) All single large axons  
512 were counted, whether or not they were myelinated; (2) Only myelinated axons were counted.

513

### 514 **Data Analysis**

515 In each experiment, data collection and analysis were performed identically, regardless of mouse  
516 genotype. Data are presented as mean  $\pm$  SD. Statistical analysis was done using the two-sample  
517 Mann-Whitney test for two-group comparisons and analysis of variance (ANOVA) with Tukey's  
518 test for multiple comparisons, according to the number of samples and the analysis of mice at  
519 multiple ages. Sample sizes were similar to those employed in the field and are indicated in the  
520 main text, methods or figure legends. A p-value of 0.05 or less was considered statistically  
521 significant.

522

### 523 **ACKNOWLEDGMENTS**

524 We thank Alan Tessler and members of the Son laboratory for critical reading of the manuscript.  
525 We thank Dr. Hyukmin Kim for intraperitoneal injection, Dr. Eric Olson for Yap and Taz floxed  
526 mice, Drs. Ueli Suter and Kelly Monk for Plp-creERT2 mice. Plp-creERT2 mice were generated  
527 by Dr. Ueli Suter using a patented Cre-ERT2 construct developed by Dr. Pierre Chambon at  
528 GIE-CERBM. This paper is dedicated to the memory of Dr. Wesley Thompson who revealed the  
529 pivotal roles of terminal Schwann cells in forming and restoring nerve-muscle connection.

530

### 531 **COMPETING INTERESTS**

532 The authors declare no competing financial interests.

533

### 534 **FUNDINGS**

535 This work was supported by grants from Shriners Hospitals for Children and NIH NINDS  
536 (NS105796 to Y-J.S.).

537

### 538 **REFERENCES**

- 539 Arthur-Farraj, P. J., Latouche, M., Wilton, D. K., Quintes, S., Chabrol, E., Banerjee, A.,  
540 Woodhoo, A., Jenkins, B., Rahman, M., Turmaine, M., Wicher, G. K., Mitter, R.,  
541 Greensmith, L., Behrens, A., Raivich, G., Mirsky, R., and Jessen, K. R. (2012). c-Jun  
542 reprograms Schwann cells of injured nerves to generate a repair cell essential for  
543 regeneration. *Neuron*, 75(4), 633-647. doi:10.1016/j.neuron.2012.06.021
- 544 Arthur-Farraj, P. J., Morgan, C. C., Adamowicz, M., Gomez-Sanchez, J. A., Fazal, S. V.,  
545 Beucher, A., Razzaghi, B., Mirsky, R., Jessen, K. R., and Aitman, T. J. (2017). Changes  
546 in the Coding and Non-coding Transcriptome and DNA Methylome that Define the  
547 Schwann Cell Repair Phenotype after Nerve Injury. *Cell Rep*, 20(11), 2719-2734.  
548 doi:10.1016/j.celrep.2017.08.064
- 549 Atanasoski, S., Boentert, M., De Ventura, L., Pohl, H., Baranek, C., Beier, K., Young, P.,  
550 Barbacid, M., and Suter, U. (2008). Postnatal Schwann cell proliferation but not  
551 myelination is strictly and uniquely dependent on cyclin-dependent kinase 4 (cdk4). *Mol*  
552 *Cell Neurosci*, 37(3), 519-527. doi:10.1016/j.mcn.2007.11.005
- 553 Atanasoski, S., Shumas, S., Dickson, C., Scherer, S. S., and Suter, U. (2001). Differential cyclin  
554 D1 requirements of proliferating Schwann cells during development and after injury. *Mol*  
555 *Cell Neurosci*, 18(6), 581-592. doi:10.1006/mcne.2001.1055
- 556 Beirowski, B., Adalbert, R., Wagner, D., Grumme, D. S., Addicks, K., Ribchester, R. R., and  
557 Coleman, M. P. (2005). The progressive nature of Wallerian degeneration in wild-type  
558 and slow Wallerian degeneration (WldS) nerves. *BMC Neurosci*, 6, 6. doi:10.1186/1471-  
559 2202-6-6
- 560 Clemence, A., Mirsky, R., and Jessen, K. R. (1989). Non-myelin-forming Schwann cells  
561 proliferate rapidly during Wallerian degeneration in the rat sciatic nerve. *J Neurocytol*,  
562 18(2), 185-192.
- 563 Cotton, J. L., Li, Q., Ma, L., Park, J. S., Wang, J., Ou, J., Zhu, L. J., Ip, Y. T., Johnson, R. L., and  
564 Mao, J. (2017). YAP/TAZ and Hedgehog Coordinate Growth and Patterning in  
565 Gastrointestinal Mesenchyme. *Dev Cell*, 43(1), 35-47 e34.  
566 doi:10.1016/j.devcel.2017.08.019
- 567 Decker, L., Desmarquet-Trin-Dinh, C., Taillebourg, E., Ghislain, J., Vallat, J. M., and Charnay,  
568 P. (2006). Peripheral myelin maintenance is a dynamic process requiring constant  
569 Krox20 expression. *J Neurosci*, 26(38), 9771-9779. doi:10.1523/JNEUROSCI.0716-  
570 06.2006
- 571 Deng, Y., Wu, L. M. N., Bai, S., Zhao, C., Wang, H., Wang, J., Xu, L., Sakabe, M., Zhou, W.,  
572 Xin, M., and Lu, Q. R. (2017). A reciprocal regulatory loop between TAZ/YAP and G-  
573 protein Galphas regulates Schwann cell proliferation and myelination. *Nat Commun*, 8,  
574 15161. doi:10.1038/ncomms15161
- 575 Domenech-Estevez, E., Baloui, H., Meng, X., Zhang, Y., Deinhardt, K., Dupree, J. L., Einheber,  
576 S., Chrast, R., and Salzer, J. L. (2016). Akt Regulates Axon Wrapping and Myelin Sheath

- 577 Thickness in the PNS. *J Neurosci*, 36(16), 4506-4521. doi:10.1523/jneurosci.3521-  
578 15.2016
- 579 Feltri, M. L., Poitelon, Y., and Previtali, S. C. (2016). How Schwann Cells Sort Axons: New  
580 Concepts. *Neuroscientist*, 22(3), 252-265. doi:10.1177/1073858415572361
- 581 Fernando, R. N., Cotter, L., Perrin-Tricaud, C., Berthelot, J., Bartolami, S., Pereira, J. A.,  
582 Gonzalez, S., Suter, U., and Tricaud, N. (2016). Optimal myelin elongation relies on  
583 YAP activation by axonal growth and inhibition by Crb3/Hippo pathway. *Nat Commun*, 7,  
584 12186. doi:10.1038/ncomms12186
- 585 Fex Svenningsen, A., and Dahlin, L. B. (2013). Repair of the Peripheral Nerve-Remyelination that  
586 Works. *Brain Sci*, 3(3), 1182-1197. doi:10.3390/brainsci3031182
- 587 Fontana, X., Hristova, M., Da Costa, C., Patodia, S., Thei, L., Makwana, M., Spencer-Dene, B.,  
588 Latouche, M., Mirsky, R., Jessen, K. R., Klein, R., Raivich, G., and Behrens, A. (2012).  
589 c-Jun in Schwann cells promotes axonal regeneration and motoneuron survival via  
590 paracrine signaling. *J Cell Biol*, 198(1), 127-141. doi:10.1083/jcb.201205025
- 591 Frendo, M. E., da Silva, A., Phan, K. D., Riche, S., and Butler, S. J. (2019). The Cofilin/Limk1  
592 Pathway Controls the Growth Rate of Both Developing and Regenerating Motor Axons.  
593 *J Neurosci*, 39(47), 9316-9327. doi:10.1523/jneurosci.0648-19.2019
- 594 Gaudet, A. D., Popovich, P. G., and Ramer, M. S. (2011). Wallerian degeneration: gaining  
595 perspective on inflammatory events after peripheral nerve injury. *Journal of*  
596 *neuroinflammation*, 8, 110. doi:10.1186/1742-2094-8-110
- 597 Gomez-Sanchez, J. A., Carty, L., Iruarrizaga-Lejarreta, M., Palomo-Irigoyen, M., Varela-Rey,  
598 M., Griffith, M., Hantke, J., Macias-Camara, N., Azkargorta, M., Aurrekoetxea, I., De  
599 Juan, V. G., Jefferies, H. B., Aspichueta, P., Elortza, F., Aransay, A. M., Martinez-  
600 Chantar, M. L., Baas, F., Mato, J. M., Mirsky, R., Woodhoo, A., and Jessen, K. R. (2015).  
601 Schwann cell autophagy, myelinophagy, initiates myelin clearance from injured nerves. *J*  
602 *Cell Biol*, 210(1), 153-168. doi:10.1083/jcb.201503019
- 603 Grove, M., and Brophy, P. J. (2014). FAK is required for Schwann cell spreading on immature  
604 basal lamina to coordinate the radial sorting of peripheral axons with myelination. *J*  
605 *Neurosci*, 34(40), 13422-13434. doi:10.1523/JNEUROSCI.1764-14.2014
- 606 Grove, M., Kim, H., Santerre, M., Krupka, A. J., Han, S. B., Zhai, J., Cho, J. Y., Park, R., Harris,  
607 M., Kim, S., Sawaya, B. E., Kang, S. H., Barbe, M. F., Cho, S. H., Lemay, M. A., and  
608 Son, Y. J. (2017). YAP/TAZ initiate and maintain Schwann cell myelination. *Elife*, 6.  
609 doi:10.7554/eLife.20982
- 610 Herbert, A. L., and Monk, K. R. (2017). Advances in myelinating glial cell development. *Curr*  
611 *Opin Neurobiol*, 42, 53-60. doi:10.1016/j.conb.2016.11.003



- 612 Jang, S. Y., Shin, Y. K., Park, S. Y., Park, J. Y., Lee, H. J., Yoo, Y. H., Kim, J. K., and Park, H.  
613 T. (2016). Autophagic myelin destruction by Schwann cells during Wallerian  
614 degeneration and segmental demyelination. *Glia*, 64(5), 730-742. doi:10.1002/glia.22957
- 615 Jessen, K. R., and Mirsky, R. (2008). Negative regulation of myelination: relevance for  
616 development, injury, and demyelinating disease. *Glia*, 56(14), 1552-1565.  
617 doi:10.1002/glia.20761
- 618 Jessen, K. R., and Mirsky, R. (2016). The repair Schwann cell and its function in regenerating  
619 nerves. *J Physiol*, 594(13), 3521-3531. doi:10.1113/jp270874
- 620 Kang, H., and Lichtman, J. W. (2013). Motor axon regeneration and muscle reinnervation in  
621 young adult and aged animals. *J Neurosci*, 33(50), 19480-19491.  
622 doi:10.1523/jneurosci.4067-13.2013
- 623 Leone, D. P., Genoud, S., Atanasoski, S., Grausenburger, R., Berger, P., Metzger, D., Macklin,  
624 W. B., Chambon, P., and Suter, U. (2003). Tamoxifen-inducible glia-specific Cre mice  
625 for somatic mutagenesis in oligodendrocytes and Schwann cells. *Mol Cell Neurosci*,  
626 22(4), 430-440.
- 627 Lopez-Anido, C., Poitelon, Y., Gopinath, C., Moran, J. J., Ma, K. H., Law, W. D., Antonellis, A.,  
628 Feltri, M. L., and Svaren, J. (2016). Tead1 regulates the expression of Peripheral Myelin  
629 Protein 22 during Schwann cell development. *Hum Mol Genet*. doi:10.1093/hmg/ddw158
- 630 Mindos, T., Dun, X. P., North, K., Doddrell, R. D., Schulz, A., Edwards, P., Russell, J., Gray, B.,  
631 Roberts, S. L., Shivane, A., Mortimer, G., Pirie, M., Zhang, N., Pan, D., Morrison, H.,  
632 and Parkinson, D. B. (2017). Merlin controls the repair capacity of Schwann cells after  
633 injury by regulating Hippo/YAP activity. *J Cell Biol*, 216(2), 495-510.  
634 doi:10.1083/jcb.201606052
- 635 Mogha, A., Harty, B. L., Carlin, D., Joseph, J., Sanchez, N. E., Suter, U., Piao, X., Cavalli, V.,  
636 and Monk, K. R. (2016). Gpr126/Adgrg6 Has Schwann Cell Autonomous and  
637 Nonautonomous Functions in Peripheral Nerve Injury and Repair. *J Neurosci*, 36(49),  
638 12351-12367. doi:10.1523/JNEUROSCI.3854-15.2016
- 639 Moon, S., Yeon Park, S., and Woo Park, H. (2018). Regulation of the Hippo pathway in cancer  
640 biology. *Cell Mol Life Sci*, 75(13), 2303-2319. doi:10.1007/s00018-018-2804-1
- 641 Parkinson, D. B., Bhaskaran, A., Arthur-Farraj, P., Noon, L. A., Woodhoo, A., Lloyd, A. C.,  
642 Feltri, M. L., Wrabetz, L., Behrens, A., Mirsky, R., and Jessen, K. R. (2008). c-Jun is a  
643 negative regulator of myelination. *J Cell Biol*, 181(4), 625-637.  
644 doi:10.1083/jcb.200803013
- 645 Poitelon, Y., Lopez-Anido, C., Catignas, K., Berti, C., Palmisano, M., Williamson, C., Ameroso,  
646 D., Abiko, K., Hwang, Y., Gregorieff, A., Wrana, J. L., Asmani, M., Zhao, R., Sim, F. J.,  
647 Wrabetz, L., Svaren, J., and Feltri, M. L. (2016). YAP and TAZ control peripheral  
648 myelination and the expression of laminin receptors in Schwann cells. *Nat Neurosci*,  
649 19(7), 879-887. doi:10.1038/nn.4316

- 650 Quintes, S., Brinkmann, B. G., Ebert, M., Frob, F., Kungl, T., Arlt, F. A., Tarabykin, V.,  
651 Huylebroeck, D., Meijer, D., Suter, U., Wegner, M., Sereda, M. W., and Nave, K. A.  
652 (2016). Zeb2 is essential for Schwann cell differentiation, myelination and nerve repair.  
653 *Nat Neurosci*. doi:10.1038/nn.4321
- 654 Scheib, J., and Hoke, A. (2013). Advances in peripheral nerve regeneration. *Nat Rev Neurol*,  
655 9(12), 668-676. doi:10.1038/nrneurol.2013.227
- 656 Scherer, S. S., Wang, D. Y., Kuhn, R., Lemke, G., Wrabetz, L., and Kamholz, J. (1994). Axons  
657 regulate Schwann cell expression of the POU transcription factor SCIP. *J Neurosci*, 14(4),  
658 1930-1942.
- 659 Shin, J. E., Geisler, S., and DiAntonio, A. (2014). Dynamic regulation of SCG10 in regenerating  
660 axons after injury. *Exp Neurol*, 252, 1-11. doi:10.1016/j.expneurol.2013.11.007
- 661 Son, Y.-J., and Thompson, W. J. (1995). Schwann cell processes guide regeneration of  
662 peripheral axons. *Neuron*, 14, 125-132.
- 663 Stassart, R. M., Fledrich, R., Velanac, V., Brinkmann, B. G., Schwab, M. H., Meijer, D., Sereda,  
664 M. W., and Nave, K. A. (2013). A role for Schwann cell-derived neuregulin-1 in  
665 remyelination. *Nat Neurosci*, 16(1), 48-54. doi:10.1038/nn.3281
- 666 Stierli, S., Napoli, I., White, I. J., Cattin, A. L., Monteza Cabrejos, A., Garcia Calavia, N.,  
667 Malong, L., Ribeiro, S., Nihouarn, J., Williams, R., Young, K. M., Richardson, W. D.,  
668 and Lloyd, A. C. (2018). The regulation of the homeostasis and regeneration of  
669 peripheral nerve is distinct from the CNS and independent of a stem cell population.  
670 *Development*, 145(24). doi:10.1242/dev.170316
- 671 Topilko, P., Schneider-Maunoury, S., Levi, G., Baron-Van Evercooren, A., Chennoufi, A. B.,  
672 Seitanidou, T., Babinet, C., and Charnay, P. (1994). Krox-20 controls myelination in the  
673 peripheral nervous system. *Nature*, 371(6500), 796-799. doi:10.1038/371796a0
- 674 Tricaud, N., and Park, H. T. (2017). Wallerian demyelination: chronicle of a cellular cataclysm.  
675 *Cell Mol Life Sci*, 74(22), 4049-4057. doi:10.1007/s00018-017-2565-2
- 676 Varelas, X. (2014). The Hippo pathway effectors TAZ and YAP in development, homeostasis  
677 and disease. *Development*, 141(8), 1614-1626. doi:10.1242/dev.102376
- 678 von Gise, A., Lin, Z., Schlegelmilch, K., Honor, L. B., Pan, G. M., Buck, J. N., Ma, Q., Ishiwata,  
679 T., Zhou, B., Camargo, F. D., and Pu, W. T. (2012). YAP1, the nuclear target of Hippo  
680 signaling, stimulates heart growth through cardiomyocyte proliferation but not  
681 hypertrophy. *Proc Natl Acad Sci U S A*, 109(7), 2394-2399.  
682 doi:10.1073/pnas.1116136109
- 683 Wang, J., Liu, S., Heallen, T., and Martin, J. F. (2018). The Hippo pathway in the heart: pivotal  
684 roles in development, disease, and regeneration. *Nat Rev Cardiol*, 15(11), 672-684.  
685 doi:10.1038/s41569-018-0063-3

- 686 Wu, L. M., Wang, J., Conidi, A., Zhao, C., Wang, H., Ford, Z., Zhang, L., Zweier, C., Ayee, B.  
687 G., Maurel, P., Zwijsen, A., Chan, J. R., Jankowski, M. P., Huylebroeck, D., and Lu, Q.  
688 R. (2016). Zeb2 recruits HDAC-NuRD to inhibit Notch and controls Schwann cell  
689 differentiation and remyelination. *Nat Neurosci*. doi:10.1038/nn.4322
- 690 Wu, L. M. N., Deng, Y., Wang, J., Zhao, C., Wang, J., Rao, R., Xu, L., Zhou, W., Choi, K.,  
691 Rizvi, T. A., Remke, M., Rubin, J. B., Johnson, R. L., Carroll, T. J., Stemmer-  
692 Rachamimov, A. O., Wu, J., Zheng, Y., Xin, M., Ratner, N., and Lu, Q. R. (2018).  
693 Programming of Schwann Cells by Lats1/2-TAZ/YAP Signaling Drives Malignant  
694 Peripheral Nerve Sheath Tumorigenesis. *Cancer Cell*, 33(2), 292-308 e297.  
695 doi:10.1016/j.ccell.2018.01.005
- 696 Xin, M., Kim, Y., Sutherland, L. B., Murakami, M., Qi, X., McAnally, J., Porrello, E. R.,  
697 Mahmoud, A. I., Tan, W., Shelton, J. M., Richardson, J. A., Sadek, H. A., Bassel-Duby,  
698 R., and Olson, E. N. (2013). Hippo pathway effector Yap promotes cardiac regeneration.  
699 *Proc Natl Acad Sci U S A*, 110(34), 13839-13844. doi:10.1073/pnas.1313192110
- 700 Yu, F. X., Zhao, B., and Guan, K. L. (2015). Hippo Pathway in Organ Size Control, Tissue  
701 Homeostasis, and Cancer. *Cell*, 163(4), 811-828. doi:10.1016/j.cell.2015.10.044
- 702 Zanconato, F., Cordenonsi, M., and Piccolo, S. (2016). YAP/TAZ at the Roots of Cancer.  
703 *Cancer Cell*, 29(6), 783-803. doi:10.1016/j.ccell.2016.05.005
- 704 Zhang, H., Deo, M., Thompson, R. C., Uhler, M. D., and Turner, D. L. (2012). Negative  
705 regulation of Yap during neuronal differentiation. *Dev Biol*, 361(1), 103-115.  
706 doi:10.1016/j.ydbio.2011.10.017

707  
708

## 709 **FIGURE LEGENDS**

### 710 **Figure 1. Loss and recovery of YAP/TAZ in Schwann cells after sciatic nerve crush**

711 YAP/TAZ expression in crushed sciatic nerves of adult mice, shown by IHC (A, B) and Western  
712 blotting (C). Axons and Schwann cell (SC) nuclei are marked by neurofilament (NF) or Sox10,  
713 respectively. (A) A surgery schematic for nerve crush, which permits regeneration of axons into  
714 the distal nerve stump, illustrated by a low-magnification, longitudinal section of a sciatic nerve  
715 at 12 dpi, immunostained for YAP and TAZ. (B) Dramatic loss of YAP/TAZ in SC nuclei by 3  
716 dpi, concomitant with axon degeneration, followed by upregulation of YAP/TAZ after 6 dpi,  
717 concomitant with axon regeneration. Right-most panels: zoomed area of merged images, as  
718 indicated, showing nuclear expression of YAP/TAZ in SCs associated with large diameter axons,  
719 before and after injury. Arrows point to large diameter axons in distal nerves before injury or 1  
720 dpi, associated with YAP/TAZ+ SC nuclei. Arrowheads point to regenerating axons. Note that

721 SC nuclei associated with a thin regenerating axon at 3 dpi do not express nuclear YAP/TAZ, but  
722 those in contact with a large diameter axon after 6 dpi do. Scale bars; 500 $\mu$ m (A), 20 $\mu$ m (B). (C)  
723 Western blotting of intact and crushed nerve lysates, showing loss of YAP and TAZ by 3 dpi,  
724 followed by full recovery of TAZ but not YAP by 12 dpi. Quantification of Western blots: n =  
725 3-5 mice per experiment. ns = not significant, 2-way ANOVA. YAP: 1 dpi intact vs 1dpi crushed,  
726 P = 0.9991; 1 dpi crushed vs 3 dpi crushed, \*\*\*\*P < 0.0001; 1 dpi crushed vs 6 dpi crushed,  
727 \*\*\*P = 0.0009; 1 dpi crushed vs 12 dpi crushed, \*\*\*\*P < 0.0001; 3 dpi intact vs 3 dpi crushed,  
728 \*\*\*\*P < 0.0001; 3 dpi crushed vs 6 dpi crushed, P = 0.0652; 3 dpi crushed vs 12 dpi crushed, P =  
729 0.3479; 6 dpi intact vs 6 dpi crushed, \*\*\*P = 0.0009; 6 dpi crushed vs 12 dpi crushed, \*\*P =  
730 0.0018; 12 dpi intact vs 12 dpi crushed, \*\*\*\*P < 0.0001. TAZ: 1 dpi intact vs 1 dpi crushed, P =  
731 0.9909; 1 dpi crushed vs 3 dpi crushed, \*\*\*\*P < 0.0001; 1 dpi crushed vs 6 dpi crushed, P =  
732 0.6855; 1 dpi crushed vs 12 dpi crushed, P = 0.9692; 3 dpi intact vs 3 dpi crushed, \*\*\*\*P <  
733 0.0001; 3 dpi crushed vs 6 dpi crushed, \*\*\*\*P < 0.0001; 3 dpi crushed vs 12 dpi crushed, \*\*\*\*P  
734 < 0.0001; 6 dpi intact vs 6 dpi crushed, P = 0.9828; 6 dpi crushed vs 12 dpi crushed, P = 0.9810;  
735 12 dpi intact vs 12 dpi crushed, P > 0.9999.

736

737 The following figure supplements are available for Figure 1.

### 738 **Figure 1-figure supplement 1**

#### 739 **Additional assessment of YAP expression in Schwann cells after nerve injury**

740 (A) Validation of a YAP-specific antibody. The antibody labels perineurial cells but not SC  
741 nuclei in intact sciatic nerves of *Yap* cKO (*Mpz-Cre; Yap<sup>fl/fl</sup>; Taz<sup>+/+</sup>*, Upper panel), whereas it  
742 labels SC nuclei in *Taz* cKO mice (*Mpz-Cre; Yap<sup>+/+</sup>; Taz<sup>fl/fl</sup>*, Bottom panel). (B) Longitudinal  
743 sections of crushed nerves, showing loss of YAP from SC nuclei in distal nerves by 3 dpi,  
744 followed by re-upregulation at or after 6 dpi. Scale bars = 15 $\mu$ m (A, B).

745

### 746 **Figure 1- source data 1**

#### 747 **Source files for Yap and Taz Western graphs**

748 This zip archive contains the raw data for WT and iDKO used for the quantitative analysis  
749 shown in Figure 1C. Data are in GraphPad Prism files, as indicated.

750

### 751 **Figure 1-source data 2**

752 **Time course of YAP and TAZ protein expression in WT nerves after sciatic nerve crush.**

753 Uncropped Western blots of images used to make Figure 1C. Individually processed samples  
754 from 6 mice at 3 dpi, 5 mice at 12 dpi, and 3 mice at both 1 dpi and 6 dpi are shown and used for  
755 quantification. X.....X denotes the line along which membranes were cut prior to probing with  
756 anti-beta actin antibody. Two exposures of anti-YAP/TAZ blot are shown.

757

758 **Figure 2. YAP/TAZ expression in Schwann cells after sciatic nerve transection**

759 (A, B, C) YAP/TAZ expression in transected sciatic nerves of adult mice. Axons and Schwann  
760 cell (SC) nuclei are marked by neurofilament (NF) or Sox10, respectively. (A) A surgery  
761 schematic for nerve transection illustrated by a low-magnification, longitudinal section of a  
762 sciatic nerve at 12 dpi, immunostained for YAP and TAZ. Axon regeneration into the distal  
763 nerve stump was prevented by ligating the transected nerve stumps. (B) Complete loss of  
764 YAP/TAZ in SC nuclei at and after 3 dpi, concomitant with axon degeneration. Right-most  
765 panels: zoomed area of merged images, as indicated, showing that SCs do not upregulate  
766 YAP/TAZ in the absence of regenerating axons. (C) Cytoplasmic loss of phosphorylated YAP  
767 (p-YAP) in SCs of transected nerve. p-YAP was undetectable in axotomized SCs at 12 dpi. (D)  
768 Upregulation of p-YAP in SCs of crushed nerve. p-YAP was detectable in innervated SCs at 12  
769 dpi. Right-most panel: zoomed area of merged image, showing a SC nucleus exhibiting  
770 perinuclear cytoplasmic p-YAP. Scale bars; 500µm (A), 20µm (B-D).

771

772 **Figure 3. YAP/TAZ are dispensable for Schwann cell proliferation after axotomy**

773 (A) Schematic showing timeline of tamoxifen injection, sciatic nerve transection and sacrifice of  
774 adult WT or Yap/Taz iDKO. (B) Longitudinal sections of intact sciatic nerves showing efficient  
775 deletion of YAP/TAZ in iDKO. SC nuclei are marked by Sox10 (red). All cell nuclei are marked  
776 by DAPI (blue). (C) Longitudinal sections of transected nerves of WT or iDKO showing SCs in  
777 S-phase of the cell cycle marked by EdU (green). (D) Longitudinal sections of transected nerves  
778 of WT or iDKO showing proliferating SCs marked by Ki67 (green). (E) Transverse sections of  
779 transected nerves of WT or iDKO showing SCs marked by Sox10 (red). (F) Quantification of  
780 SCs expressing nuclear YAP/TAZ in intact sciatic nerves of WT or iDKO. n = 3 mice per  
781 genotype, \*P = 0.0495, Mann-Whitney. (G) Quantification of EdU+ SCs in transected nerves of  
782 WT or iDKO. n = 3 mice per genotype, \*P = 0.0463, Mann-Whitney. (H) Quantification of

783 Ki67+ proliferating SCs in transected nerves of WT or iDKO. n = 3 mice per genotype, ns, not  
784 significant, P = 0.5127, Mann-Whitney. (I) Quantification of Sox10+ SCs in transected nerves of  
785 WT or iDKO. n = 3 mice per genotype. ns, not significant, P = 0.8273, Mann-Whitney. Scale  
786 bars = 30µm (B-E).

787

788 The following figure supplements are available for Figure 3.

### 789 **Figure 3-figure supplement 1**

#### 790 **No Schwann cell proliferation or death in intact nerves of *Yap/Taz* iDKO at 12 dpi**

791 (A) Schematic showing experimental procedures analyzing contralateral intact nerves of WT or  
792 iDKO at 12 dpi. (B) Longitudinal sections showing absence of EdU+ SCs in S-phase in intact  
793 nerves of iDKO, as in WT. Asterisks denote EdU+ cells that are not SCs, as indicated by their  
794 lack of Sox10. (C) Longitudinal sections of contralateral intact nerves, showing absence of  
795 apoptotic SCs identified by FITC-dUTP incorporation in iDKO, as in WT. (D) Transverse  
796 sections of intact nerves, showing similar numbers of SCs (marked by Sox10) in intact nerves of  
797 WT and iDKO at 12 dpi. All nuclei are marked by DAPI. (E) Quantification of SCs in intact  
798 nerves of WT or iDKO, showing no significant difference. n = 3 mice per genotype. ns, not  
799 significant, P = 0.5127, Mann-Whitney. Scale bars = 50µm (B-D).

800

### 801 **Figure 3- source data 1**

#### 802 **Source files for EdU<sup>+</sup> SC data**

803 This zip archive contains the IHC images for one WT and one iDKO used for the quantitative  
804 analysis shown in Figure 3G. Leica SP8 confocal lif images were processed using Imaris  
805 software and saved as tiffs.

806

### 807 **Figure 3-source data 2**

#### 808 **Source files for Ki67<sup>+</sup> SC data**

809 This zip archive contains the IHC for one WT and one iDKO used for quantitative analysis  
810 shown in Figure 3H. Results and quantitation shown in the Figure used BD #550609 anti-Ki67.  
811 These results were confirmed using a second antibody, Abcam #ab15580 anti-Ki67. Images  
812 using both antibodies are included in the zip archive, in the indicated folders. Leica SP8 confocal  
813 lif images were processed using Imaris software and saved as tiffs.

814

### 815 **Figure 3- source data 3**

#### 816 **Source files for graphs quantifying Yap/Taz+ SCs, EdU+ SCs, Ki67+ SCs, and total SCs**

817 This zip archive contains the raw data for WT and iDKO used for the quantitative analysis  
818 shown in Figures 3F, 3G, 3H and 3I. The data is contained in both a text document and an Excel  
819 file, both labeled as Mann Whitney data. These files also contain data for Figures 3-S1, 4, 5, 6, 7,  
820 8A and 8-S1E.

821

### 822 **Figure 3-figure supplement 1- source data 1**

#### 823 **Source files for graph quantifying total SCs**

824 This zip archive contains the raw data for WT and iDKO used for the quantitative analysis  
825 shown in Figures 3-S1E. The data is contained in both a text document and an Excel file, both  
826 labeled as Mann Whitney data. These files also contain data for Figures 3, 4, 5, 6, 7, 8A and 8-  
827 S1E.

828

### 829 **Figure 4. Schwann cells lacking YAP/TAZ transdifferentiate into repair Schwann cells**

830 Longitudinal sections of transected sciatic nerves of WT and *Yap/Taz* iDKO immunostained by  
831 various markers of growth-promoting repair SCs at 5 dpi. SCs are marked by Sox10 (red). (A)  
832 Representative sections showing upregulation of c-Jun in iDKO SCs, as in WT SCs. (B)  
833 Upregulation of active phospho-S63 c-Jun in iDKO SCs, as in WT. (C) Upregulation of p75 in  
834 iDKO SCs, as in WT SCs. (D) Upregulation of Oct-6 in iDKO SCs, as in WT SCs. (E)  
835 Quantification of c-Jun+ SCs in WT and iDKO. n = 3 mice per genotype. ns, not significant, P =  
836 0.1266, Mann-Whitney. (F) Quantification of pc-Jun+ SCs in WT and iDKO. n = 3 mice per  
837 genotype. \*P = 0.0495, Mann-Whitney. (G) Quantification of p75+ SCs in WT and iDKO. n = 3  
838 mice per genotype. ns, not significant, P = 0.5127, Mann-Whitney. (H) Quantification of Oct-6+  
839 SCs in WT and iDKO. n = 3 mice per genotype. ns, not significant, P = 0.8273, Mann-Whitney.  
840 Scale bars = 30µm (A-D).

841

### 842 **Figure 4-source data 1**

#### 843 **Source files for c-Jun<sup>+</sup> SC data**

844 This zip archive contains the IHC for one WT and one iDKO used for quantitative analysis  
845 shown in Figure 4E. Leica SP8 confocal lif images were processed using Imaris software and  
846 saved as tiffs.

847

#### 848 **Figure 4- source data 2**

##### 849 **Source files for graphs quantifying c-Jun+ SCs, pc-Jun+ SCs, p75+ SCs, and Oct6+ SCs**

850 This zip archive contains the raw data for WT and iDKO used for the quantitative analysis  
851 shown in Figures 4E, 4F, 4G and 4H. The data is contained in both a text document and an Excel  
852 file, both labeled as Mann Whitney data. These files also contain data for Figures 3, 3-S1, 5, 6, 7,  
853 8A and 8-S1E.

854

#### 855 **Figure 4-source data 3**

##### 856 **Western blotting analysis of repair Schwann cell markers**

857 Uncropped Western blots of images used to make Figure 4-figure supplement 1. Individually  
858 processed samples from 2 WT (#656, #625) and 2 iDKO mice (#378, #379) are shown and used  
859 for quantification.

860

861 The following figure supplements are available for Figure 4

#### 862 **Figure 4-figure supplement 1**

##### 863 **Western blotting analysis of repair Schwann cell markers**

864 (A) Western blots of lysates prepared from contralateral (intact) or distal crushed sciatic nerves  
865 of WT and iDKO adult mice 5 dpi. c-Jun, active pS63-c-Jun and p75 are strongly upregulated in  
866 iDKO, as in WT. Oct6 is strongly upregulated in WT and remains elevated before and after crush  
867 in iDKO. (B) Quantification of Western blots. ns = not significant, 2-way ANOVA. c-Jun: WT  
868 intact vs WT crushed, \*\*P = 0.0035; WT intact vs iDKO intact, P = 0.9388; WT crushed vs  
869 iDKO, P > 0.9999; iDKO intact vs iDKO crushed, \*\*P = 0.0045. pc-Jun: WT intact vs WT  
870 crushed, \*\*\*P = 0.0009; WT intact vs iDKO intact, P = 0.6737; WT crushed vs iDKO crushed, P  
871 = 0.9962; iDKO intact vs iDKO crushed, \*\*P = 0.0015. p75: WT intact vs WT crushed, \*P =  
872 0.0112; WT intact vs iDKO intact, P = 0.9993; WT crushed vs iDKO crushed, P = 0.5521; iDKO  
873 intact vs iDKO crushed, \*\*P = 0.0056. Oct6: WT intact vs WT crushed, \*P = 0.0139; WT intact



874 vs iDKO intact, \*P = 0.0157; WT crushed vs iDKO crushed, P = 0.2109; iDKO intact vs iDKO  
875 crushed, P = 0.2541.

876

#### 877 **Figure 4-figure supplement 1- source data 1**

#### 878 **Source files for graphs quantifying c-Jun, pc-Jun, p75 and Oct6 Westerns.**

879 This zip archive contains the raw data for WT and iDKO used for the quantitative analysis  
880 shown in Figure 4-S1. Data are in GraphPad Prism files, as indicated.

881

#### 882 **Figure 5. Schwann cells lacking YAP/TAZ support axon regeneration**

883 (A) Schematic showing relative locations and sizes of the distal nerve segments used for  
884 ultrastructural or light microscopic analysis of axon regeneration in WT or Yap/Taz iDKO, 12-  
885 13 days after nerve crush. (B) Low magnification views of longitudinal sections of ~5 mm long  
886 nerve segments distal to the crush site, showing regenerated axons in iDKO as abundant as in  
887 WT. Axons are marked by TuJ1. (C, D) High magnification views of boxed area in (B), ~8 mm  
888 distal to the crush site. (E) Low and high magnification views of TEM, taken at 5mm distal to the  
889 crush site, showing numerous axons that regenerated within basal lamina tubes in iDKO, as in  
890 WT. 'ax' denotes an axon. Numerous axons are large (>1µm) but unmyelinated in iDKO.  
891 Examples of single large myelinated axons in WT (E-a, E-b), single large unmyelinated axon in  
892 iDKO (E-c) and axon bundles containing a large unmyelinated axon in iDKO (E-d). (F)  
893 Quantification of the axon density in crushed nerves of WT and iDKO, n = 4 mice for WT and 3  
894 mice for iDKO. ns, not significant, P = 0.4715, Mann-Whitney. (G) Quantification of the  
895 percentage of BL tubes containing axons in crushed nerves of WT and iDKO, n = 4 mice for WT  
896 and 3 mice for iDKO. ns, not significant, P = 0.7237, Mann-Whitney (H) Quantification of the  
897 percentage of BL tubes containing at least one axon > 1µm in diameter, in crushed nerves of WT  
898 and iDKO. n = 4 mice for WT and 3 mice for iDKO. ns, not significant, P = 0.1573, Mann-  
899 Whitney. (I) Quantification of the percentage of BL tubes containing multiple axons, at least one  
900 of which is > 1µm in diameter, in crushed nerves of WT and iDKO. n = 4 mice for WT and 3  
901 mice for iDKO. \*P = 0.0339, Mann-Whitney. Scale bars = 500µm (B), 100µm (C, D), 2µm (E).

902

#### 903 **Figure 5-source data 1**

#### 904 **Source files for TEM data**

905 This zip archive contains the TEM images for one WT and one iDKO used for quantitative  
906 analysis shown in Figures 5 G-I. Images were taken using a JEOL 1010 electron microscope  
907 fitted with a Hamamatsu digital camera and AMT Advantage image capture software. Contrast  
908 of the images was adjusted using Photoshop software. The images in this archive were also used  
909 for the analysis in Figure 7.

910

## 911 **Figure 5- source data 2**

### 912 **Source files for graphs quantifying TEM data**

913 This zip archive contains the raw data for WT and iDKO used for the quantitative analysis  
914 shown in Figures 5F, 5G, 5H and 5I. The data is contained in both a text document and an Excel  
915 file, both labeled as Mann Whitney data. These files also contain data for Figures 3, 3-S1, 4, 6, 7,  
916 8A and 8-S1E.

917

## 918 **Figure 6. Schwann cells lacking YAP/TAZ support timely axon regeneration after acute** 919 **injury**

920 (A) Schematic showing relative locations of crushed site, axon quantification and sizes of the  
921 distal nerve segments used for light microscopic analysis of axon regeneration in WT or Yap/Taz  
922 iDKO, 3 days after nerve crush. (B) Low magnification views of longitudinal sections, showing  
923 abundant axon regeneration in both WT and iDKO. Regenerating axons are marked by SCG10.  
924 (C, D) High magnification views of boxed areas in (B), showing numerous thin regenerating  
925 axons. (E) Quantification of the axon density measured at 2 mm distal to the crushed site.  $n = 3$   
926 mice per genotype. ns, not significant,  $P = 0.2752$ , Mann-Whitney. (F) Quantification of the  
927 distance regenerated by the longest axon.  $n = 3$  mice per genotype. ns, not significant,  $P = 0.8273$ ,  
928 Mann-Whitney. Scale bars = 1mm (B), 100 $\mu$ m (C, D).

929

## 930 **Figure 6- source data 1**

### 931 **Source files for graphs quantifying axon density and length of longest axon**

932 This zip archive contains the raw data for WT and iDKO used for the quantitative analysis  
933 shown in Figures 6E and 6F. The data is contained in both a text document and an Excel file,  
934 both labeled as Mann Whitney data. These files also contain data for Figures 3, 3-S1, 4, 5, 7, 8A  
935 and 8-S1E.

936

937 **Figure 7. Schwann cells lacking YAP/TAZ fail to myelinate regenerated axons**

938 Ultrastructural and light microscopic analyses of remyelination in distal nerves of WT or  
939 Yap/Taz iDKO, 12-13 days after nerve crush. (A) Low magnification views of longitudinal  
940 sections of intact or crushed nerves of WT and iDKO, showing no myelination of regenerated  
941 axons in crushed nerves of iDKO as indicated by the lack of MBP immunostaining. Refer to  
942 Figure 5B for robustly regenerated axons in the same iDKO mouse. (B, C) High magnification  
943 views of boxed area in (A), showing abundant regenerated axons in crushed nerves of both WT  
944 (B) and iDKO (C). Note that regenerated axons in iDKO are not myelinated. Axons and myelin  
945 are marked by TuJ1 and MBP, respectively. (D) Semi-thin sections stained with toluidine blue  
946 showing numerous myelinated axons in crushed nerves of WT but not in iDKO. (E) TEM images  
947 of representative single large axons, myelinated in WT (left panel) but unmyelinated in iDKO  
948 (right panel). (F) Quantification of the percentage of single axons that are myelinated.  $n = 4$  mice  
949 for WT and 3 mice for iDKO.  $*P = 0.0323$ , Mann-Whitney. (G) G-ratio in WT and iDKO.  
950 Myelinated axons in WT are compared to unmyelinated single axons in iDKO.  $n = 3$  mice per  
951 genotype.  $*P = 0.0495$  Mann-Whitney. Scale bars =  $500\mu\text{m}$  (A),  $100\mu\text{m}$  (B, C),  $10\mu\text{m}$  (D),  $2\mu\text{m}$   
952 (E).

953

954 **Figure 7-source data 1**

955 **Source files for TEM data**

956 This zip archive contains the TEM images for one WT and one iDKO used for quantitative  
957 analysis shown in Figures 7 F and 7 G. Images were taken using a JEOL 1010 electron  
958 microscope fitted with a Hamamatsu digital camera and AMT Advantage image capture software.  
959 Contrast of the images was adjusted using Photoshop software. The images in this archive were  
960 also used for the analysis in Figure 5.

961

962 **Figure 7- source data 2**

963 **Source files for graphs quantifying TEM data**

964 This zip archive contains the raw data for WT and iDKO used for the quantitative analysis  
965 shown in Figures 7F and 7G. The data is contained in both a text document and an Excel file,

966 both labeled as Mann Whitney data. These files also contain data for Figures 3, 3-S1, 4, 5, 6, 8A  
967 and 8-S1E.

968

969 The following figure supplements are available for Figure 7.

#### 970 **Figure 7-figure supplement 1**

##### 971 **Additional images of axon regeneration and remyelination in WT and *Yap/Taz* iDKO**

972 High magnification views of longitudinal sections of intact or crushed nerves of WT and iDKO,  
973 12-13 days after nerve crush. Axons and myelin are marked by TuJ1 (green) and MBP (red),  
974 respectively. Numerous axons regenerated in crushed nerves of iDKO, as in WT, but they are  
975 unmyelinated. Myelin remains ample, as indicated by abundant MBP, in contralateral intact  
976 nerves of iDKO at 12-13 dpi. Scale bar = 50 $\mu$ m.

977

##### 978 **Figure 8. YAP and TAZ are redundantly required for optimal remyelination**

979 (A) Western blotting of intact sciatic nerve lysates, showing markedly reduced TAZ in *Taz* iKO,  
980 whereas YAP levels remain relatively unchanged. YAP band is tighter and faster migrating in  
981 *Taz* iKO, than in WT, indicative of reduced phosphorylation. Quantification of Yap and Taz in  
982 WT and *Taz* iKO, n = 3 mice per genotype. YAP: ns, not significant, P = 0.2752, Mann-Whitney.  
983 TAZ: \*P = 0.0495, Mann-Whitney. (B) Quantification of axon density in WT, *Yap/Taz* iDKO  
984 and *Taz* iKO nerves at 12 dpi, 8-10 mm distal to crush site (also see Figures 5B, F and Figure 8-  
985 figure supplement 1B, E). n = 4 mice for WT, 3 mice for iDKO and *Taz* iKO: WT vs iDKO, P =  
986 0.72; WT vs iKO, P = 0.41; iDKO vs iKO, P = 0.18, all not significant, one-way ANOVA with  
987 Tukey's multiple comparison test. (C-G) Comparative analysis of axon regeneration and  
988 remyelination in WT and *Taz* iKO, 12-13 days after nerve crush. (C) Representative TEM  
989 images of WT and *Taz* iKO nerves, taken at 5mm distal to the crush site, showing numerous  
990 axons that regenerated within basal lamina tubes in *Taz* iKO, as in WT. 'ax' denotes a single  
991 axon. Some large axons are myelinated in *Taz* iKO. (D) Quantification of the percentage of BL  
992 tubes containing axons of any diameter in WT, *Taz* iKO and *Yap/Taz* iDKO nerves. n = 4 mice  
993 for WT, 3 mice for iDKO and 2 mice for *Taz* iKO : WT vs. iDKO, P = 0.99; WT vs. iKO, P  
994 =0.90; iDKO vs. *Taz* iKO, P = 0.92, all not significant, one-way ANOVA with Tukey's multiple  
995 comparison test. (E) Quantification of the percentage of BL tubes containing at least 1 axon  
996 larger than 1  $\mu$ m in diameter in WT, *Taz* iKO and *Yap/Taz* iDKO nerves. n = 4 mice for WT, 3

997 mice for iDKO and 2 mice for *Taz* iKO: WT vs. iDKO,  $P = 0.73$ ; WT vs. iKO,  $P = 0.22$ ; iDKO  
998 vs. iKO,  $P = 0.52$ , all not significant, one-way ANOVA with Tukey's multiple comparison test.  
999 (F) Quantification of the percentage of single axons that are remyelinated in WT, *Taz* iKO and  
1000 *Yap/Taz* iDKO nerves.  $n = 4$  mice for WT, 3 mice for iDKO and 2 mice for *Taz* iKO: WT vs.  
1001 iDKO, \*\*\*\* $P < 0.0001$ ; WT vs. iKO, \*\* $P = 0.0094$ ; iDKO vs. *Taz* iKO, \*\* $P = 0.0016$ , one-way  
1002 ANOVA with Tukey's multiple comparison test. (G) G-ratios of remyelinated axons in WT and  
1003 *Taz* iKO nerves, compared to unmyelinated axons in *Yap/Taz* iDKO nerve. WT and *Taz* iKO  
1004 remyelinated axons have equivalent G-ratios.  $n = 6$  mice for WT, 3 mice for iDKO and 2 mice  
1005 for iKO: WT vs. iDKO, \*\*\*\* $P < 0.0001$ ; WT vs. iKO, not significant,  $P = 0.074$ ; iDKO vs. iKO,  
1006 \*\*\* $P = 0.0008$ , one-way ANOVA with Tukey's multiple comparison test. Scale bar =  $2\mu\text{m}$  (C).

1007

### 1008 **Figure 8-source data 1**

#### 1009 **Source files for TEM data**

1010 This zip archive contains the TEM images for one WT and one *Taz* iKO used for quantitative  
1011 analysis shown in Figures 8 D-G. Images were taken using a JEOL 1010 electron microscope  
1012 fitted with a Hamamatsu digital camera and AMT Advantage image capture software. Contrast  
1013 of the images was adjusted using Photoshop software.

1014

### 1015 **Figure 8- source data 2**

#### 1016 **Source files for graphs quantifying Yap and Taz levels.**

1017 This zip archive contains the raw data for WT and iDKO used for the quantitative analysis  
1018 shown in Figure 8A. The data is contained in both a text document and an Excel file, both  
1019 labeled as Mann Whitney data. These files also contain data for Figures 3, 3-S1, 4, 5, 6, 7 and 8-  
1020 S1E.

1021

### 1022 **Figure 8- source data 3**

#### 1023 **Source files for graphs quantifying axon density and TEM data**

1024 This zip archive contains the raw data for WT, iDKO and *Taz* iKO used for the quantitative  
1025 analysis shown in Figures 8B, 8D, 8E, 8F and 8G. The data is contained in GraphPad Prism files,  
1026 as indicated.

### 1027 **Figure 8-source data 4.**

1028 **Loss of TAZ protein expression in sciatic nerves of *Taz* iKO mice**

1029 Uncropped Western blots of images used to make Figure 8A. Individually processed samples  
1030 from 3 WT mice (#208,#211,#213) and 3 *Taz* iKO mice (#210,#216,#249) are shown and used  
1031 for quantification. X.....X denotes the line along which membranes were cut prior to probing  
1032 with the relevant antibodies .

1033

1034 The following figure supplements are available for Figure 8.

1035 **Figure 8-figure supplement 1**

1036 **Schwann cells expressing YAP (but lacking TAZ) support axon regeneration**

1037 A) Schematic showing relative locations and sizes of the distal nerve segments used for light  
1038 microscopic and TEM analysis of axon regeneration in WT or *Taz* iDKO, 12 days after nerve  
1039 crush. (B) Low magnification views of longitudinal nerve sections beginning 5 mm distal to the  
1040 crush site, showing regenerated axons in iKO as abundant as in WT. Axons are marked by TuJ1.  
1041 (C, D) High magnification views of boxed areas in (B). Scale bars = 1 mm (B) and 100  $\mu$ m (C,  
1042 D). (E) Quantification of axon density measured at ~10 mm distal to the crush site. n = 3 mice  
1043 per genotype. ns, not significant, P = 0.2118, Mann-Whitney.

1044

1045 **Figure 8-figure supplement 1- source data 1**

1046 **Source files for graph quantifying axon density.**

1047 This zip archive contains the raw data for WT and *Taz* iKO used for the quantitative analysis  
1048 shown in Figure 8-S1E. The data is contained in both a text document and an Excel file, both  
1049 labeled as Mann Whitney data. These files also contain data for Figures 3, 3-S1, 4, 5, 6, 7 and 8.

1050

1051 **Figure 9. Redifferentiation of Schwann cells lacking YAP/TAZ**

1052 Longitudinal sections of crushed nerves of WT and *Yap/Taz* iDKO at 12 dpi, immunostained by  
1053 various markers of SC dedifferentiation (c-Jun and Oct-6), proliferation (Ki67) and  
1054 redifferentiation (Krox20). SCs are marked by Sox10. (A) Representative sections showing c-  
1055 Jun+ SCs markedly reduced in iDKO, as in WT. (B) Representative sections showing rarely  
1056 observed Ki67+ proliferating SCs in iDKO, as in WT. (C) Representative sections showing Oct-  
1057 6+ SCs reduced in iDKO, as in WT. (D) Representative sections showing failed upregulation of  
1058 Krox20 in iDKO SCs. (E) Quantitative comparison of c-Jun+ SCs at 5 and 12 dpi, showing

1059 similar downregulation of c-Jun in WT and iDKO SC. n=3 mice per genotype, 2-way ANOVA,  
1060 ns = not significant. WT 5 dpi vs WT 12 dpi, \*\*P = 0.0069; WT 5 dpi vs iDKO 5 dpi, P =  
1061 0.4260; WT 12 dpi vs iDKO 12 dpi, P = 0.9574; iDKO 5 dpi vs iDKO 12 dpi, \*\*P = 0.0018. (F)  
1062 Quantitative comparison of Ki67+ SCs, showing similar reduction in proliferating SCs in WT  
1063 and iDKO nerves between 5 dpi and 12 dpi. n=3 mice per genotype, 2-way ANOVA, ns = not  
1064 significant. WT 5 dpi vs WT 12 dpi, \*\*\*\*P < 0.0001; WT 5 dpi vs iDKO 5 dpi, P > 0.9999; WT  
1065 12 dpi vs iDKO 12 dpi, P = 0.6775; iDKO 5 dpi vs iDKO 12 dpi, \*\*\*\*P < 0.0001. (G)  
1066 Quantitative comparison of Oct-6+ SCs, showing significant downregulation of Oct-6 in WT and  
1067 iDKO SCs between 5 dpi and 12 dpi. n=3 mice per genotype, ns = not significant, 2-way  
1068 ANOVA. WT 5 dpi vs WT 12 dpi, \*\*\*P = 0.0005; WT 5 dpi vs iDKO 5 dpi, P = 0.9817; WT 12  
1069 dpi vs iDKO 12 dpi, \*P = 0.0221; iDKO 5 dpi vs iDKO 12 dpi, \*P = 0.0299. (H) Quantitative  
1070 comparison of Krox20+ SCs, showing upregulation of Krox20 in WT SCs, but not in iDKO SCs  
1071 between 5 dpi and 12 dpi. n=3 mice per genotype, 2-way ANOVA, ns = not significant. WT 5  
1072 dpi vs WT 12 dpi, \*\*\*\*P < 0.0001; WT 5 dpi vs iDKO 5 dpi, P > 0.9999; WT 12 dpi vs iDKO  
1073 12 dpi, \*\*\*\*P < 0.0001; iDKO 5 dpi vs iDKO 12 dpi, P > 0.9999. Scale bar = 10µm (A-D).

1074

#### 1075 **Figure 9-source data 1**

##### 1076 **Source files for Krox20<sup>+</sup> SC data**

1077 This zip archive contains the IHC for one WT and one iDKO used for quantitative analysis  
1078 shown in Figure 9E. Leica SP8 confocal lif images were processed using Imaris software and  
1079 saved as tiffs.

1080

#### 1081 **Figure 9- source data 2**

##### 1082 **Source files for graphs quantifying c-Jun+ SCs, Ki67+ SCs, Oct6+ SCs and Krox20+ SCs**

1083 This zip archive contains the raw data for WT and iDKO used for the quantitative analysis  
1084 shown in Figures 9E, 9F, 9G and 9H. The data is contained in GraphPad Prism files, as indicated.

1085

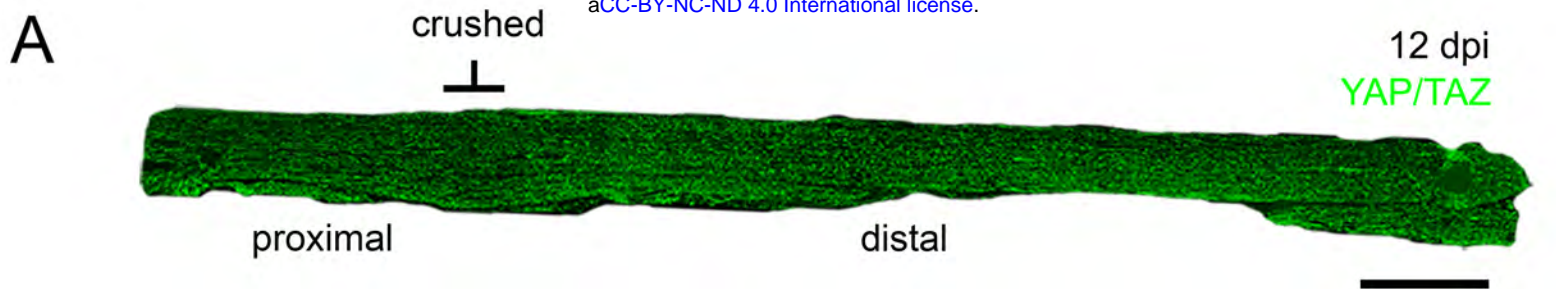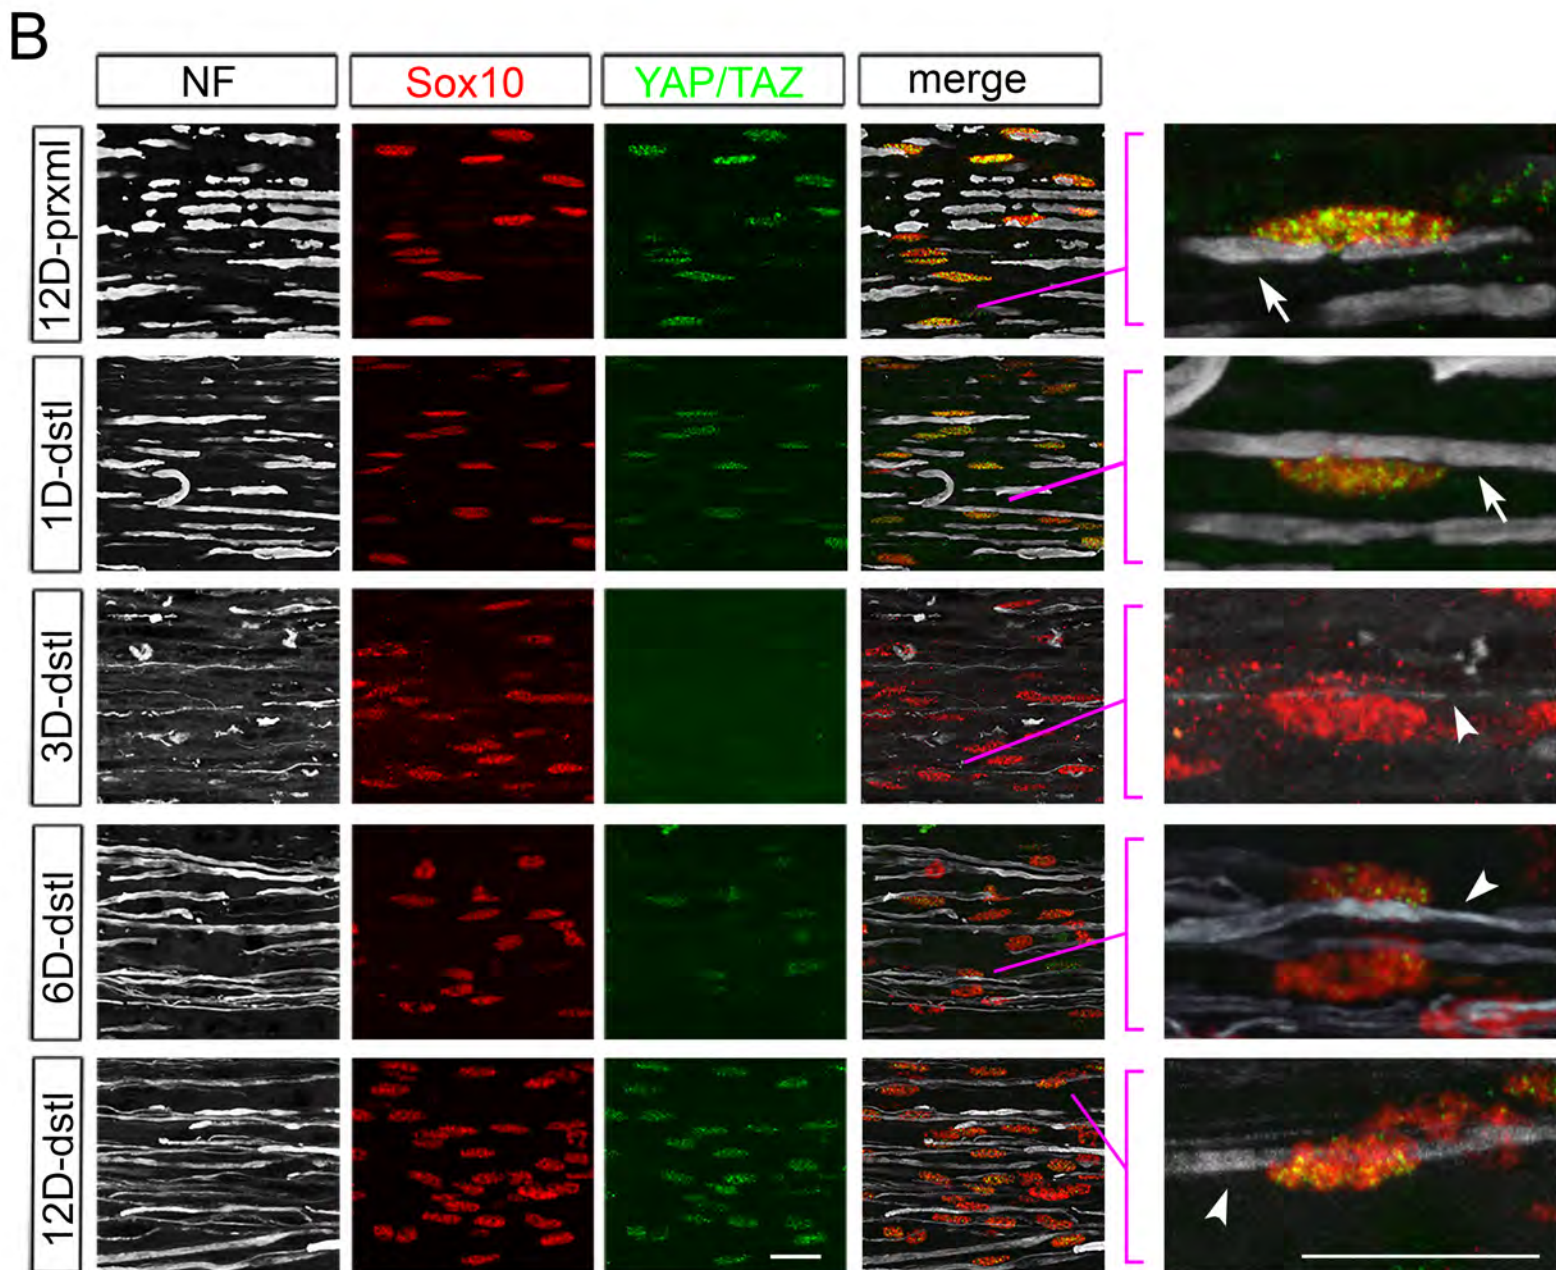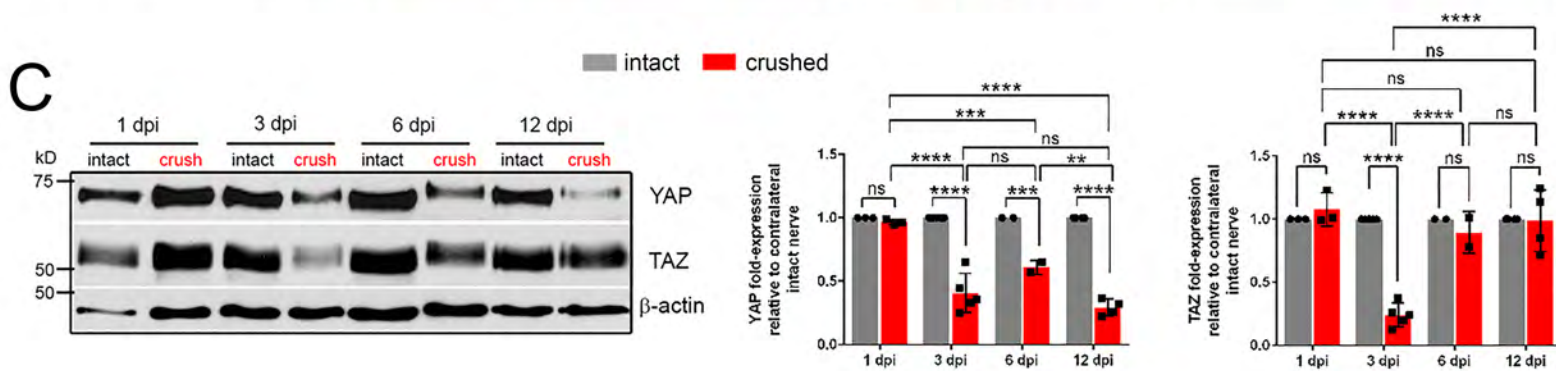



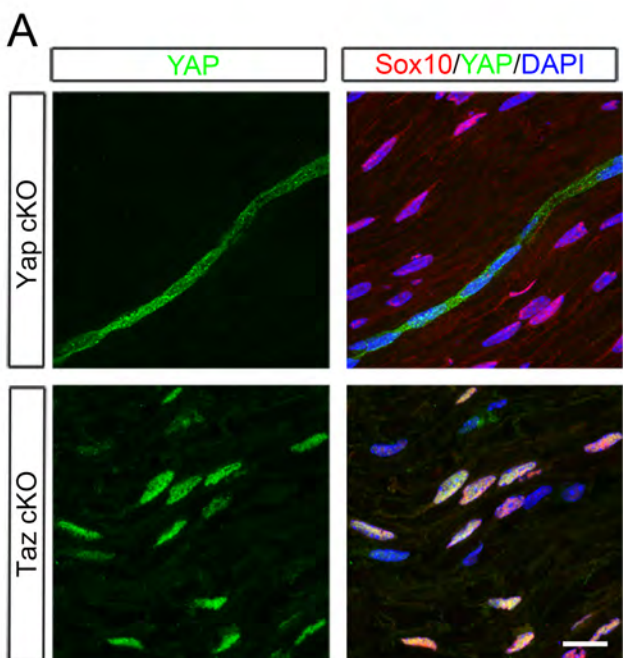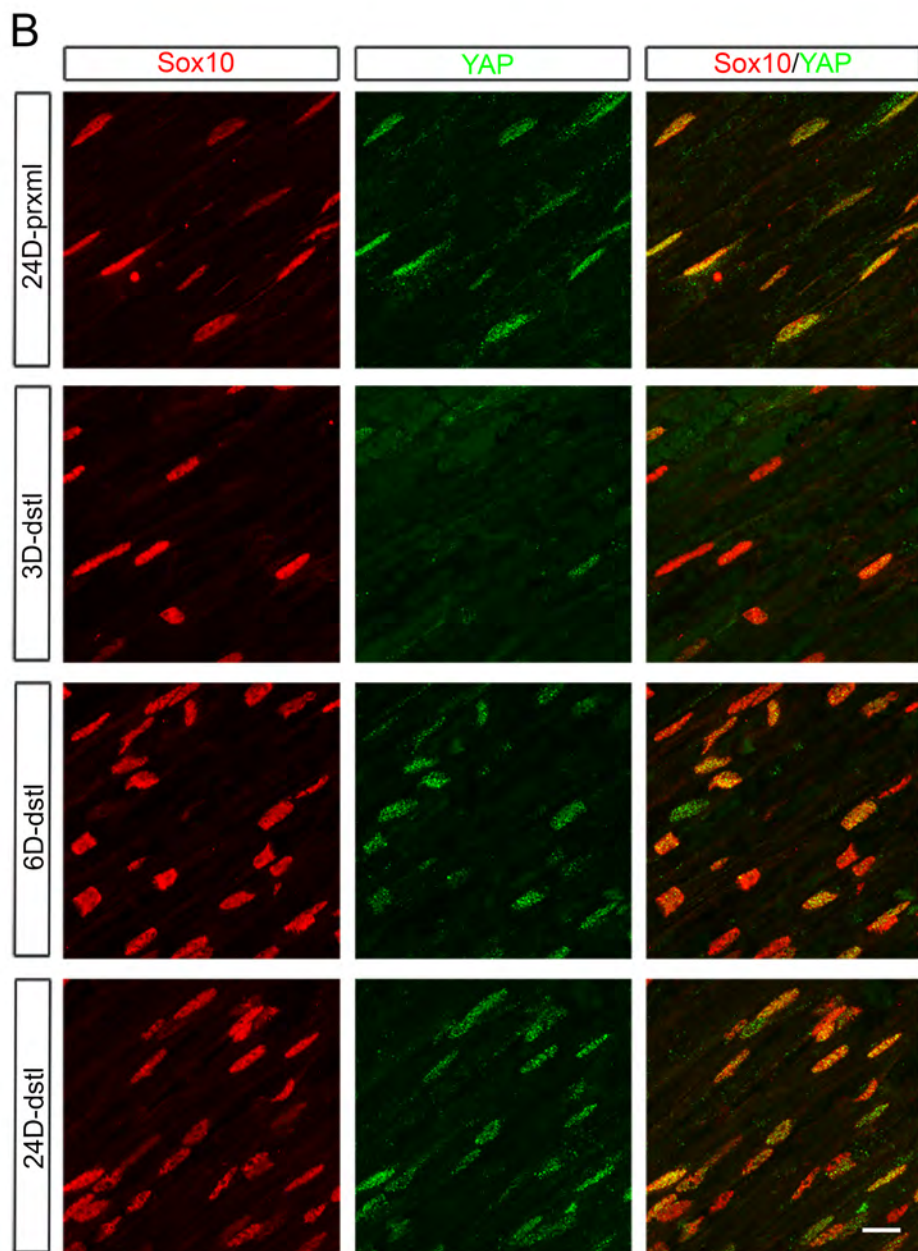

**A**

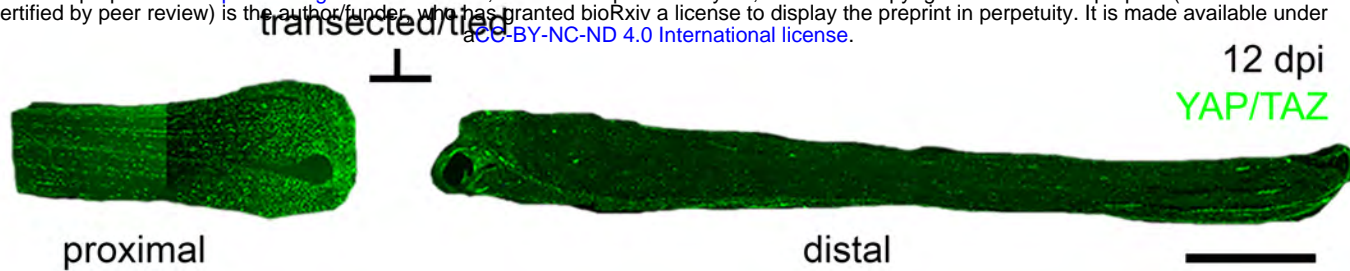

**B**

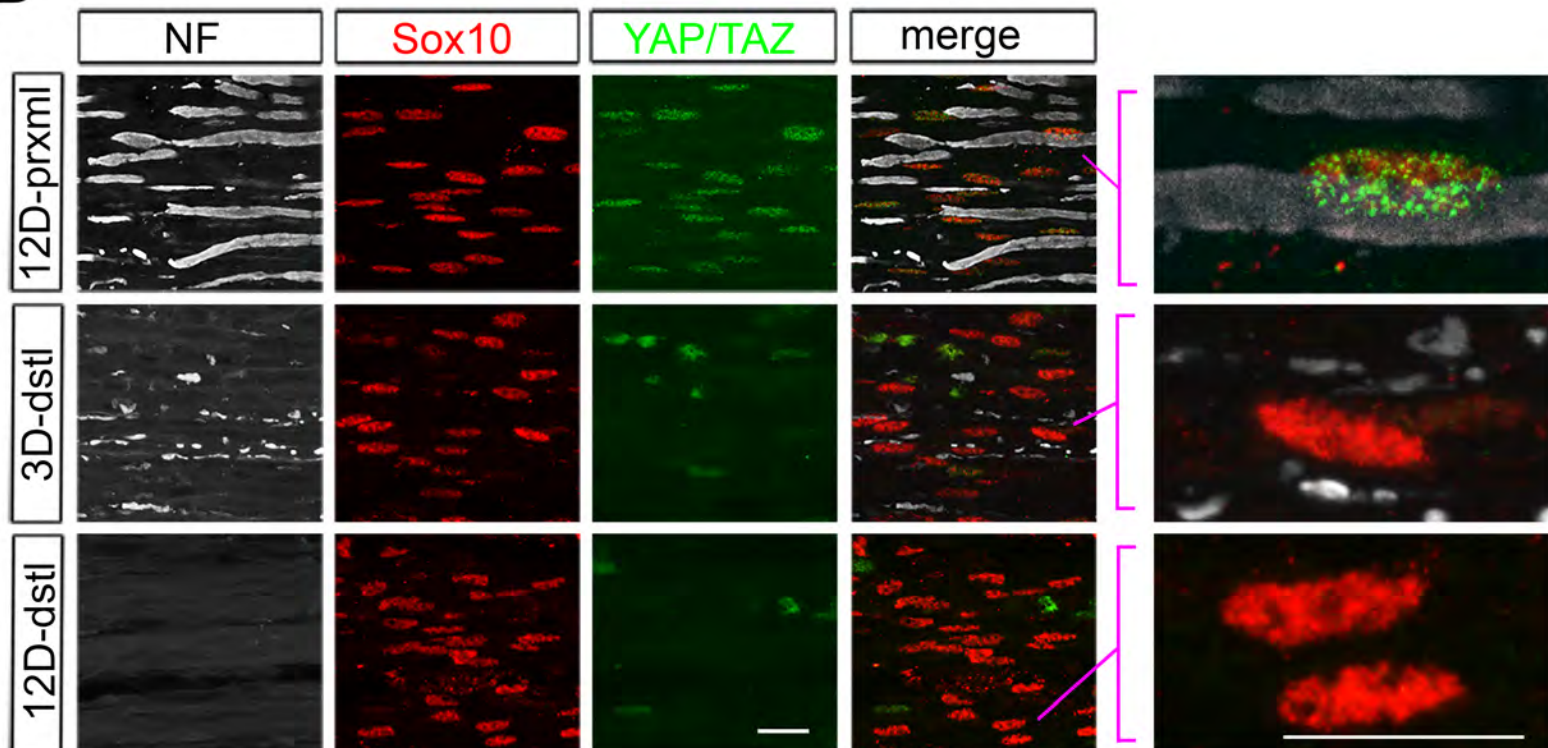

**C**

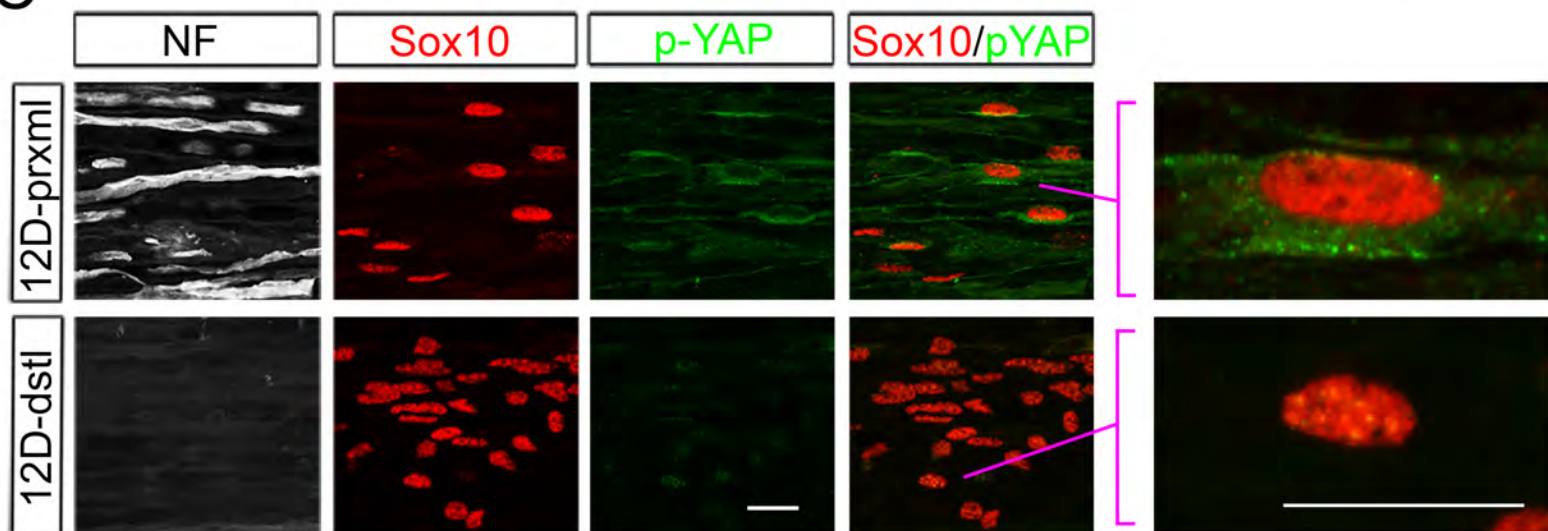

**D** crushed nerve

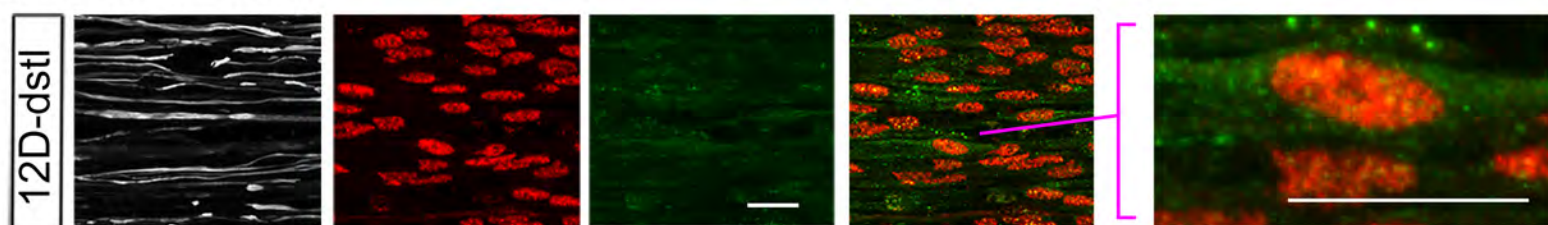

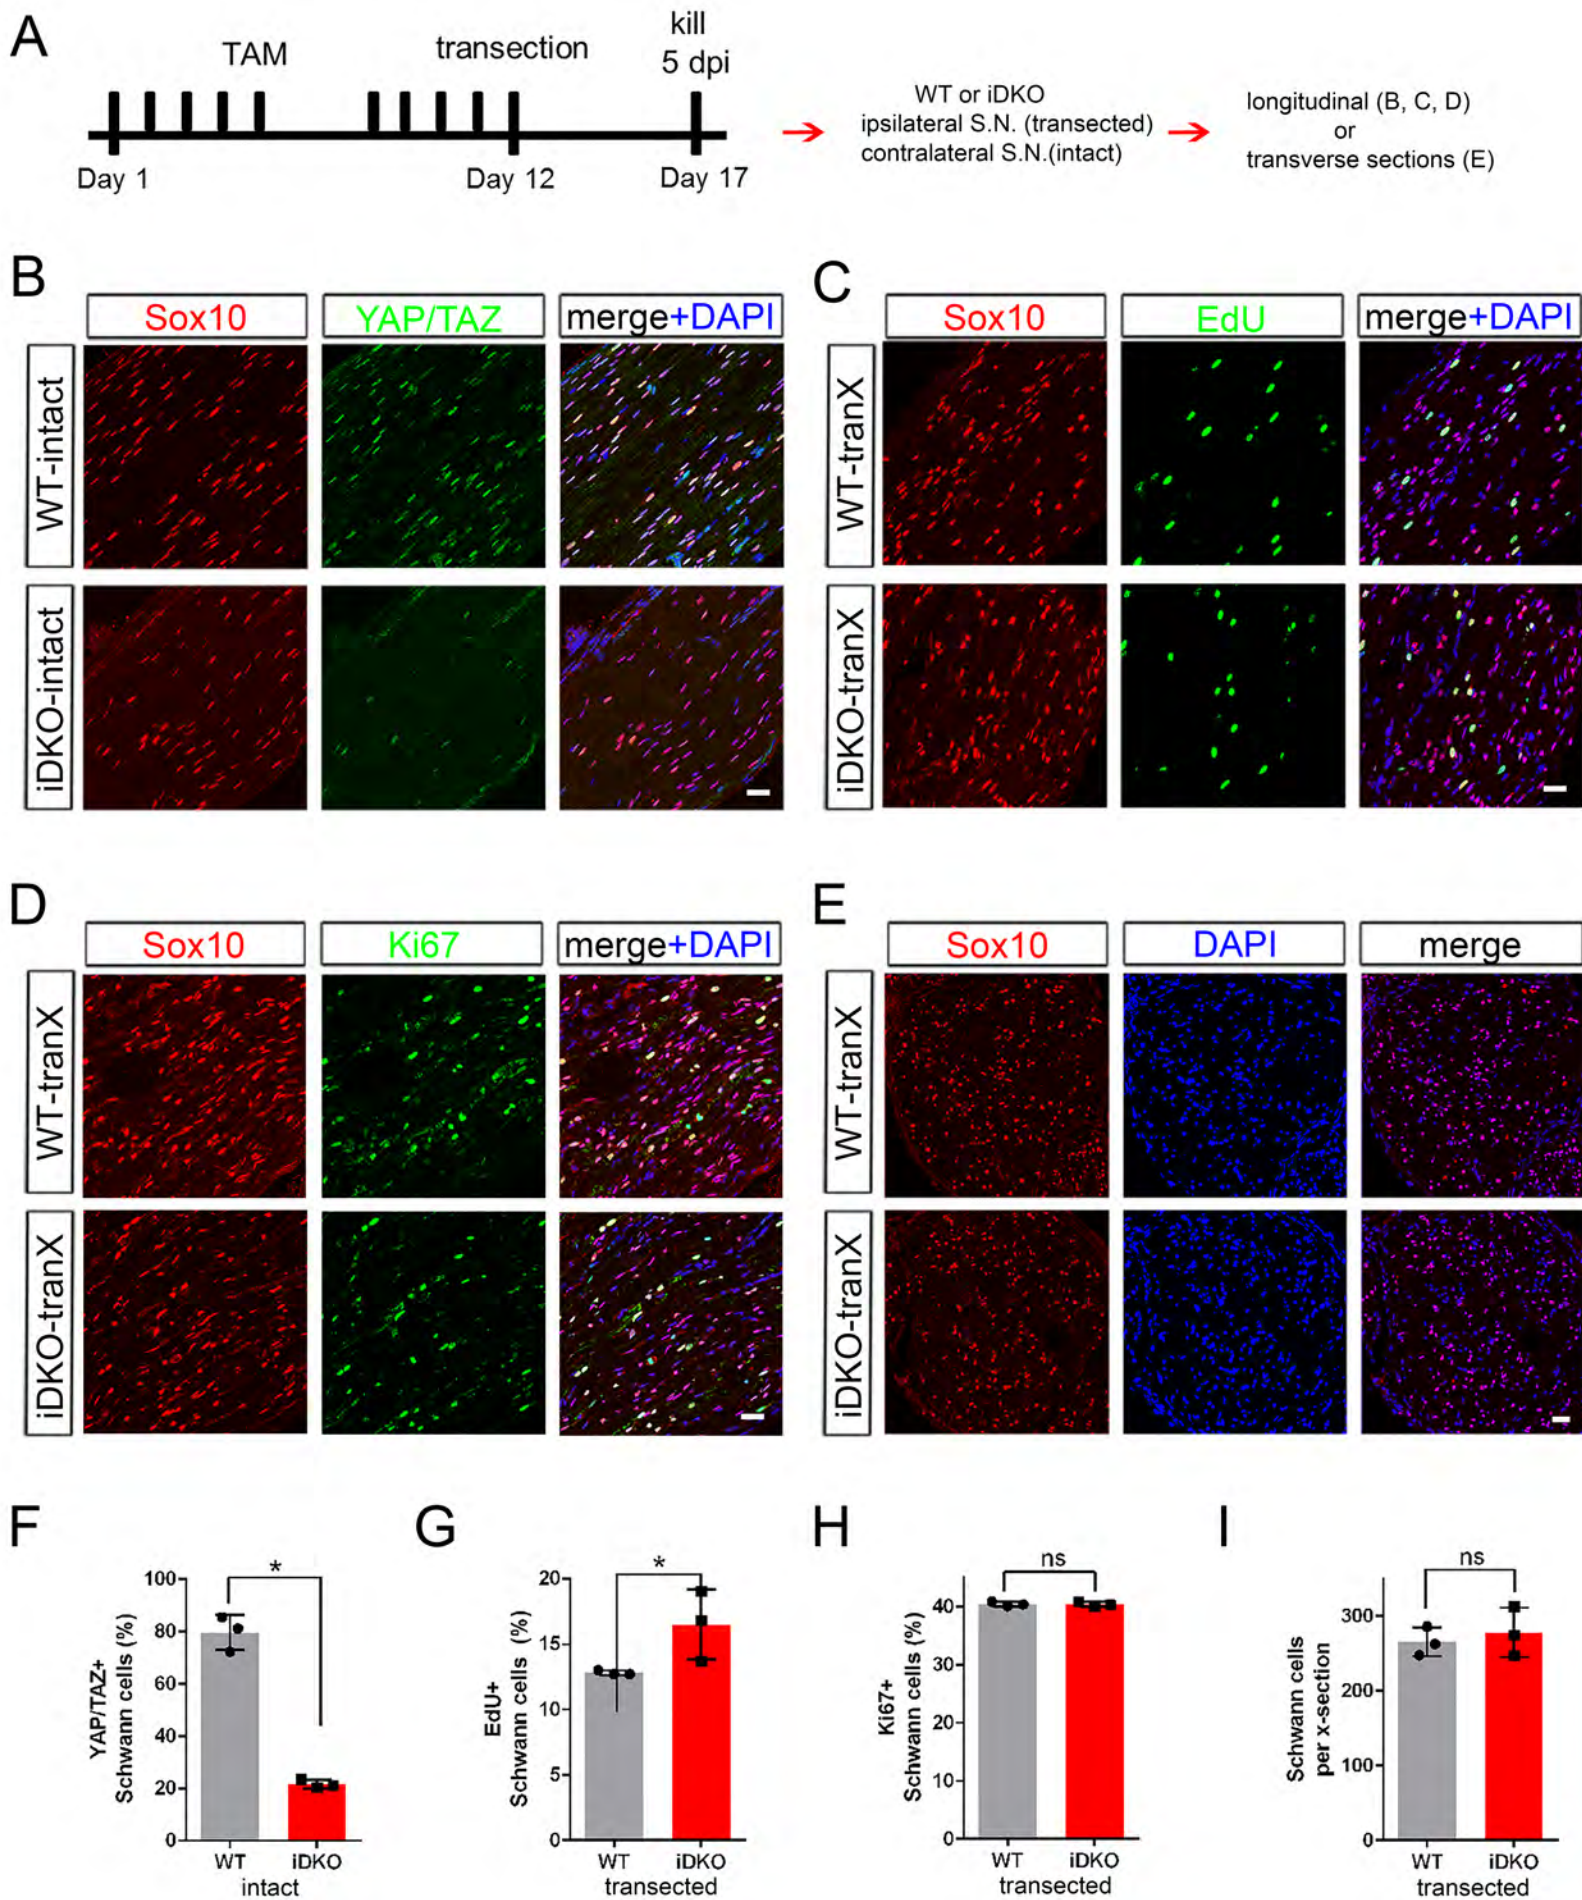

**A**

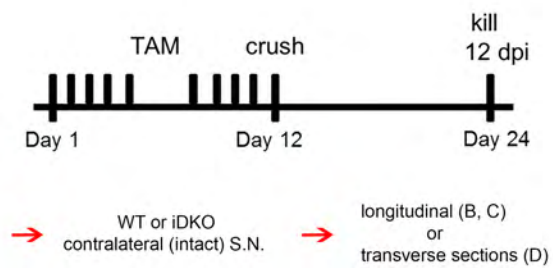

**B**

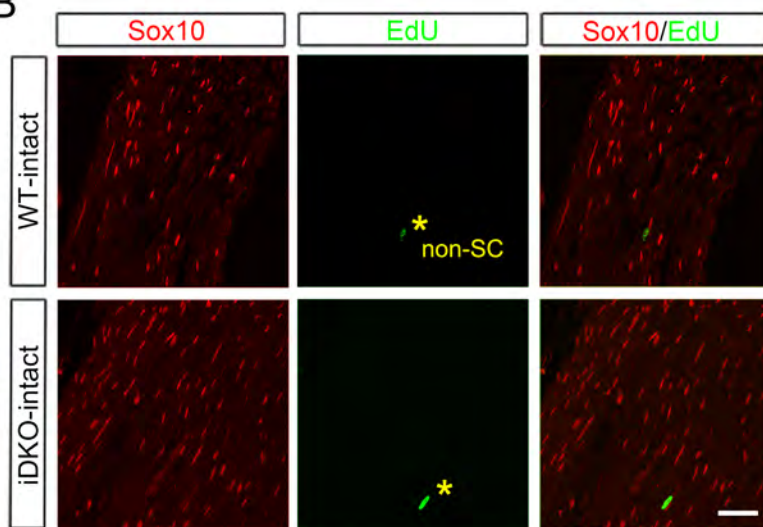

**C**

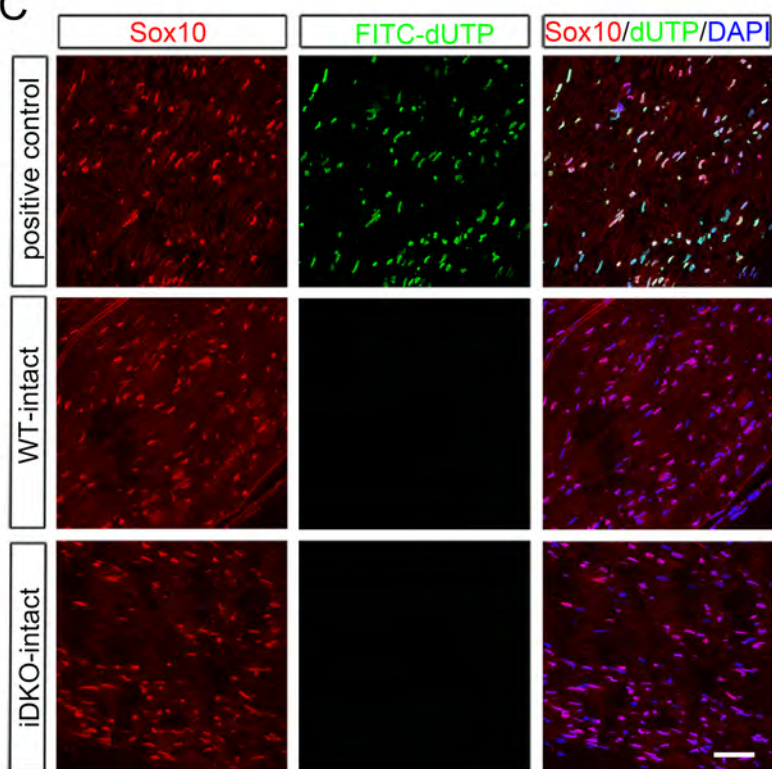

**D**

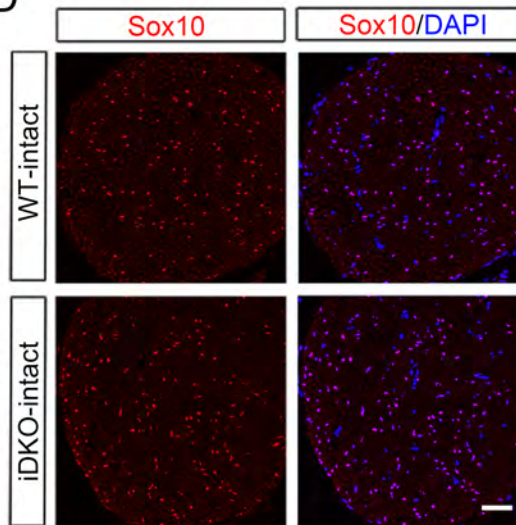

**E**

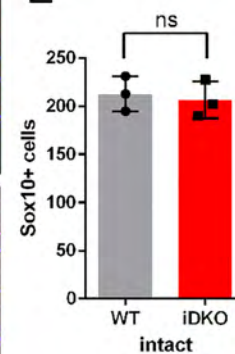

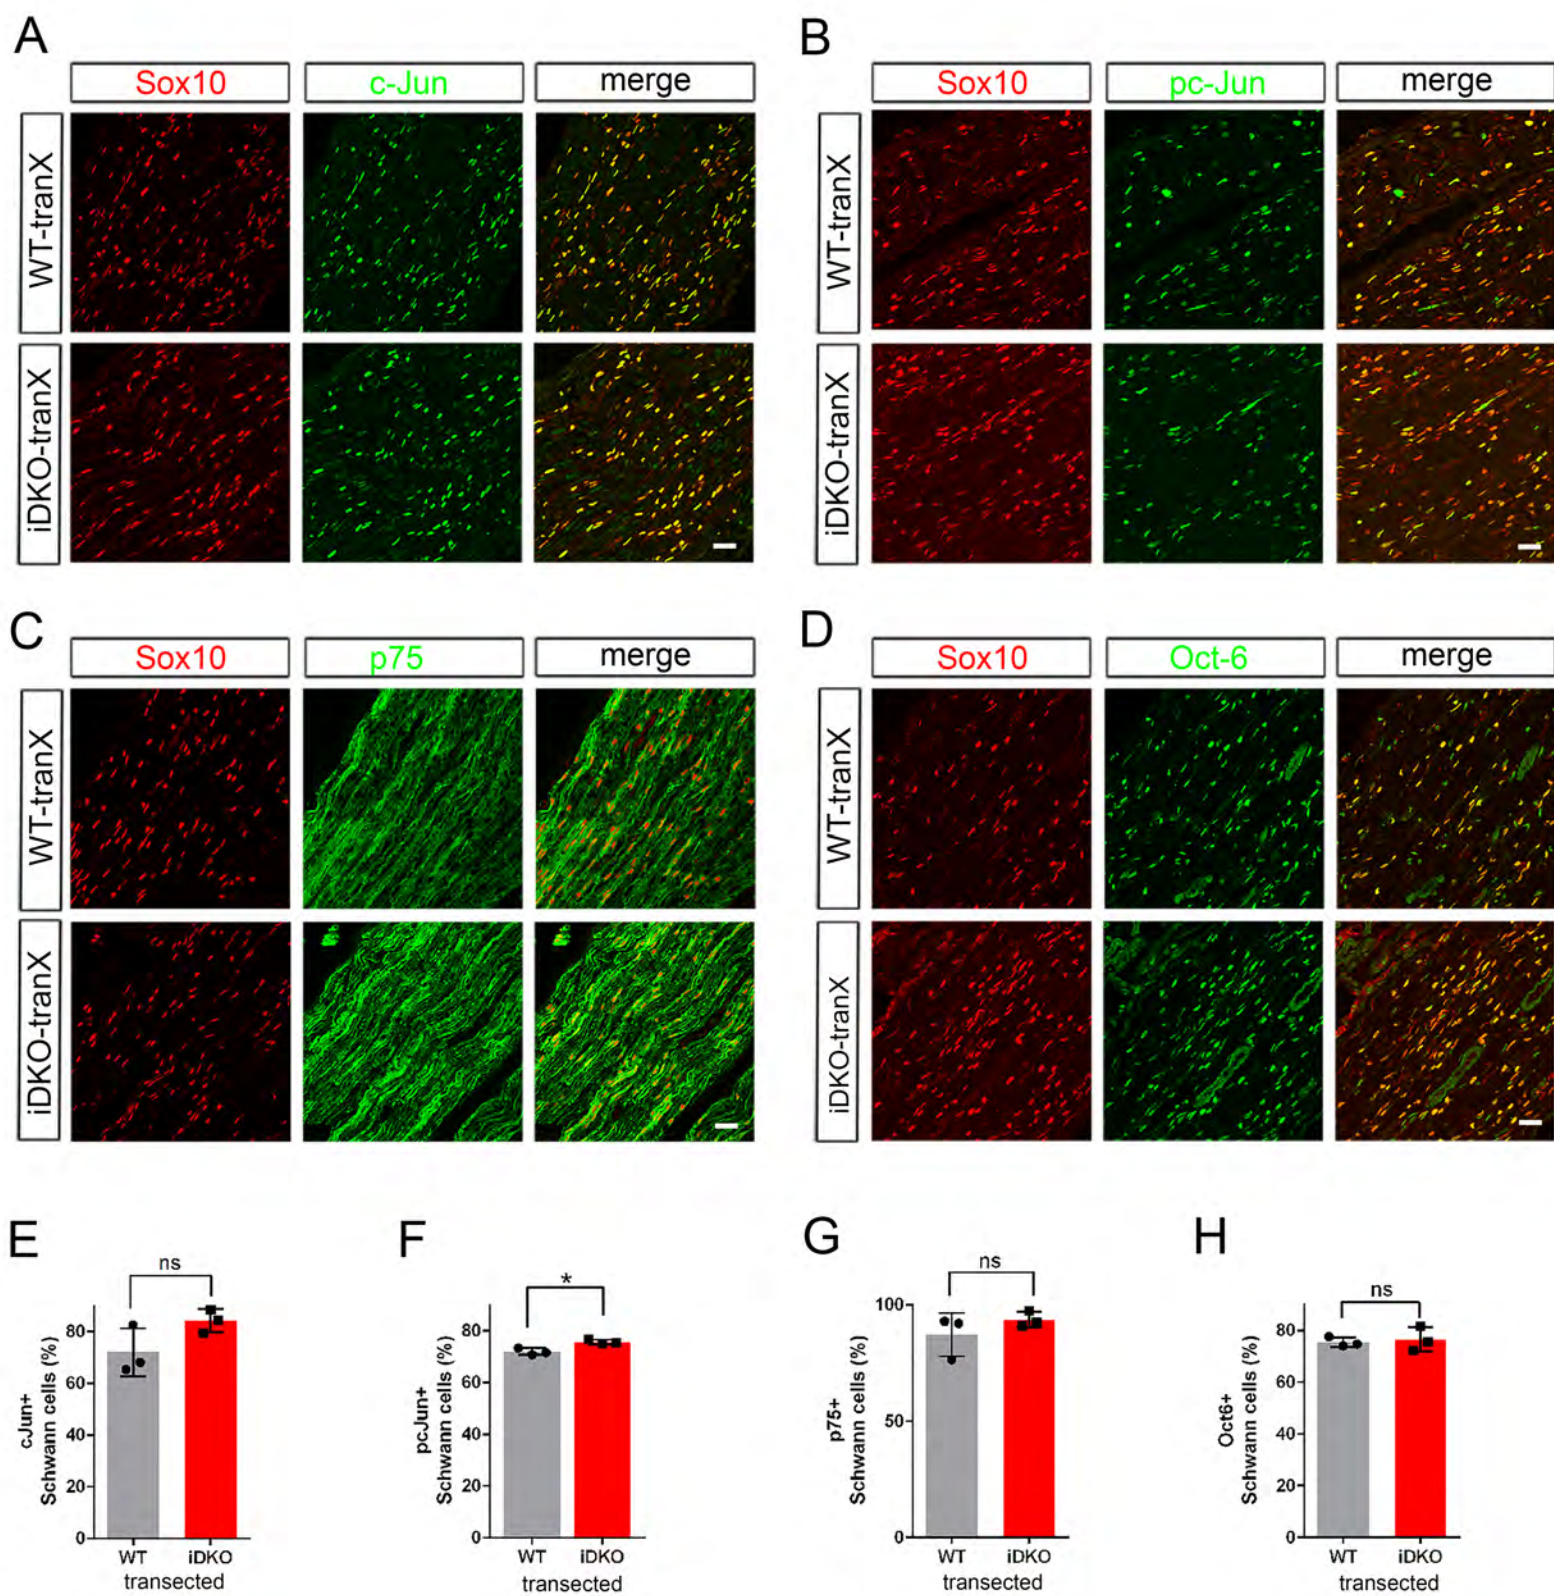

A

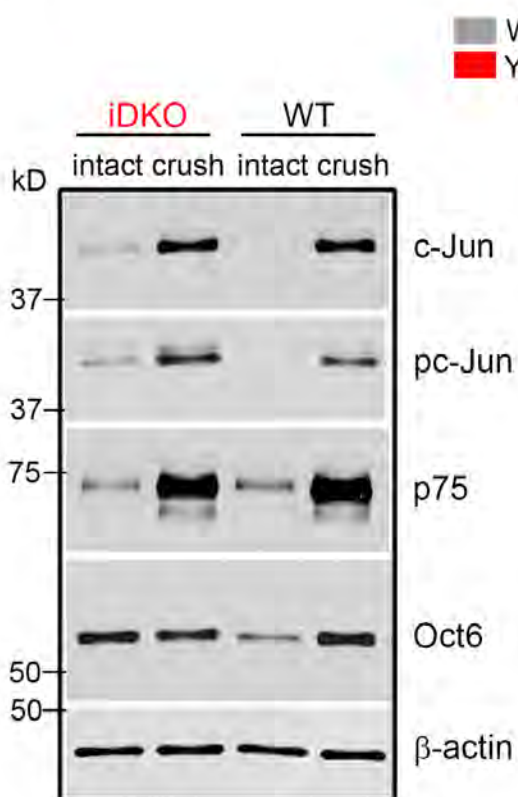

B

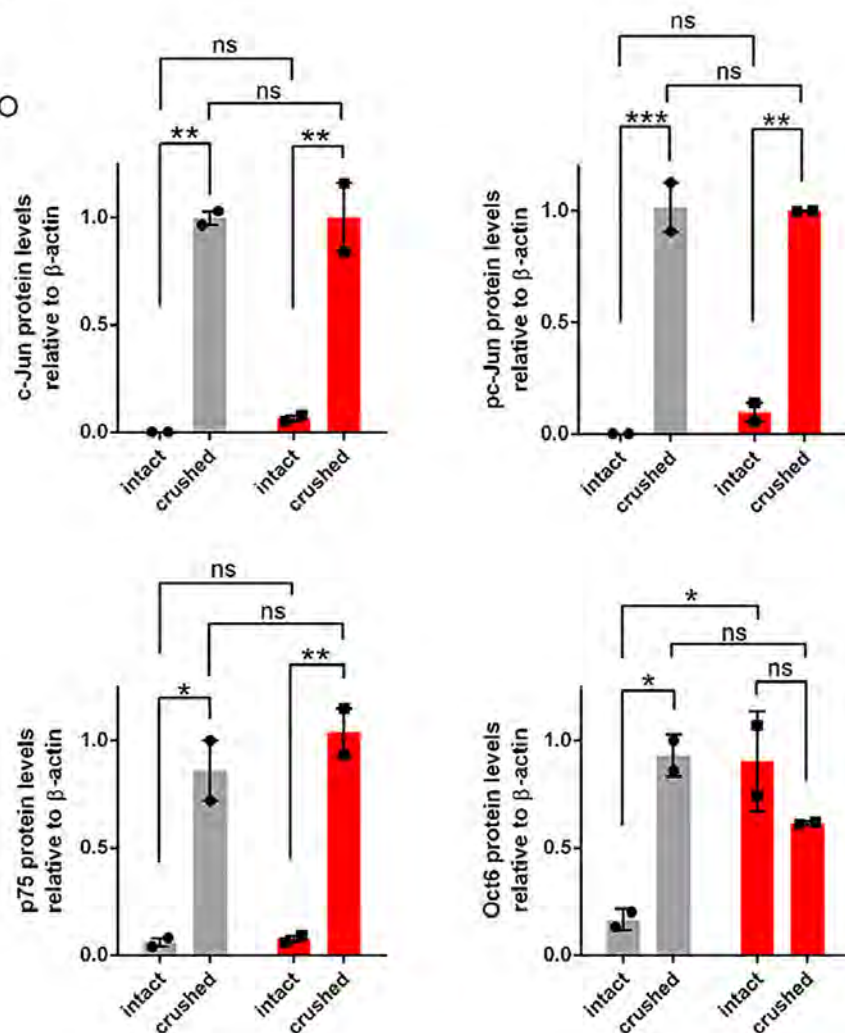

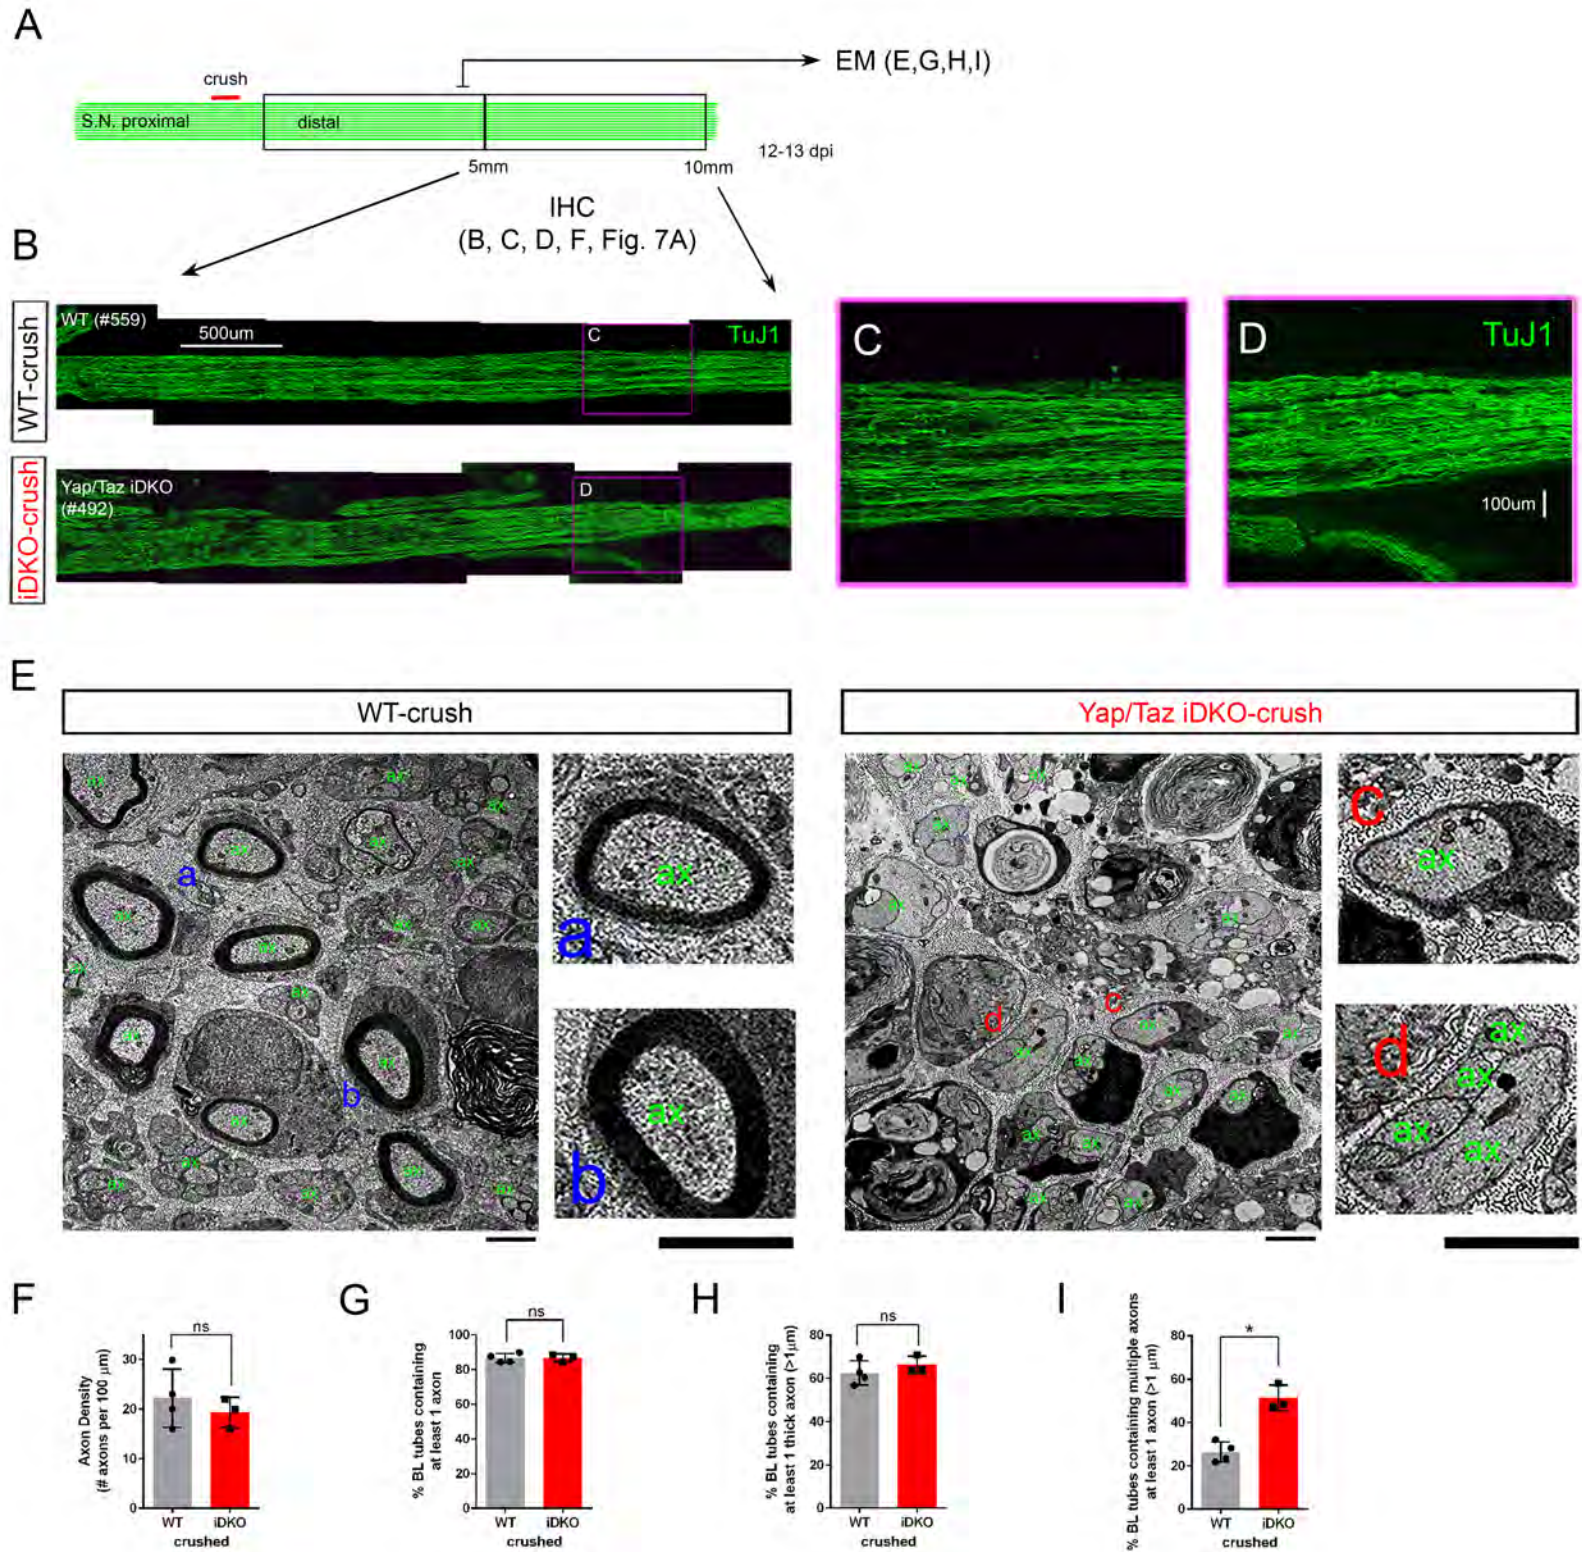

A

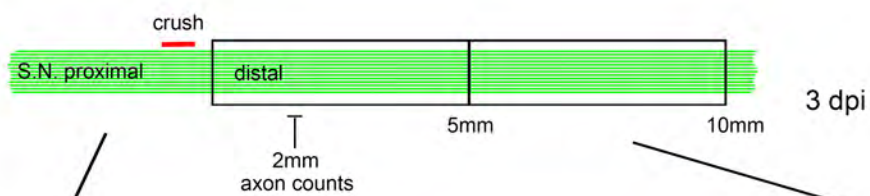

B

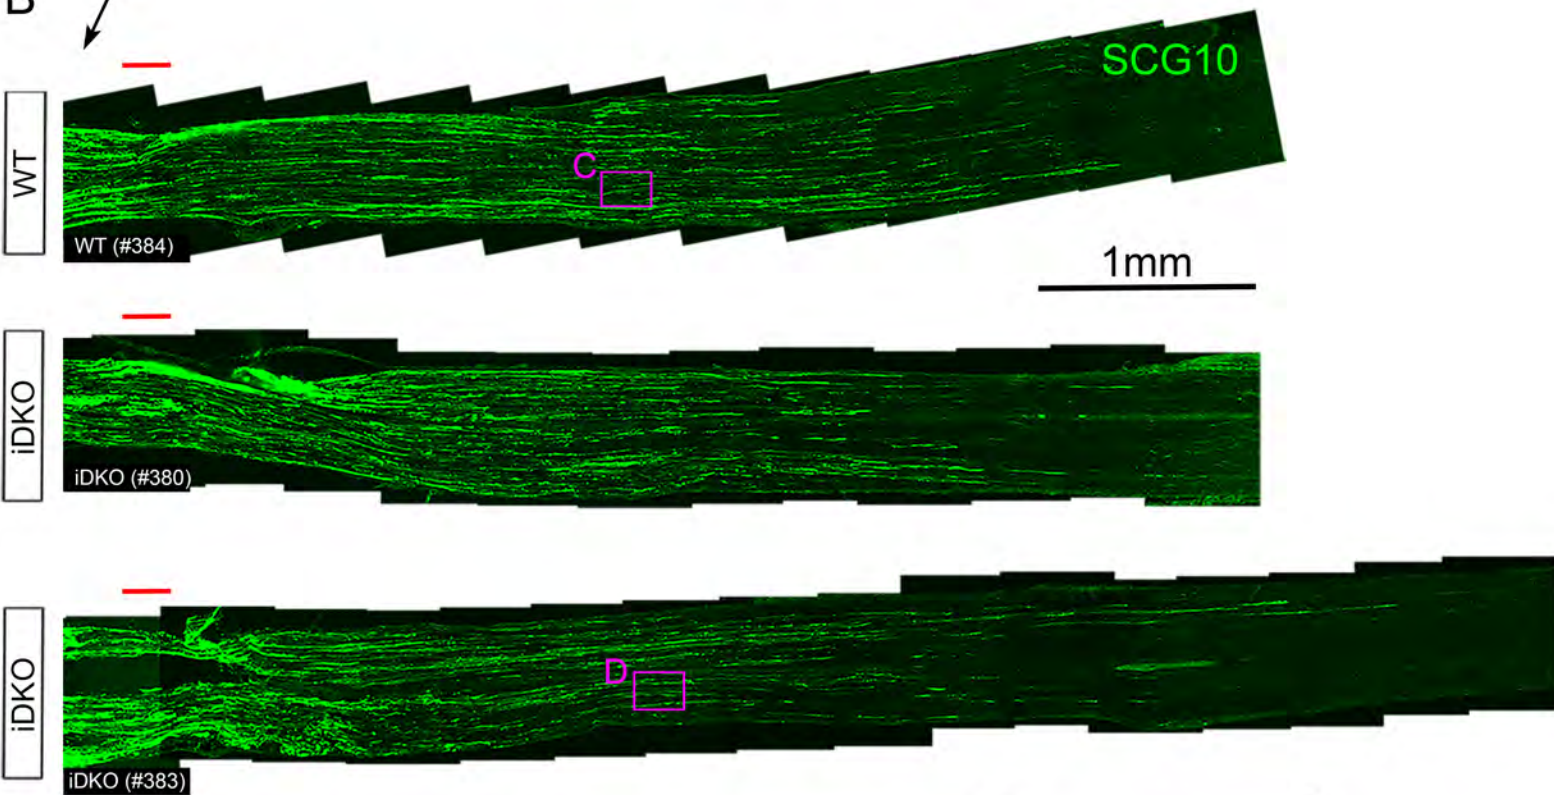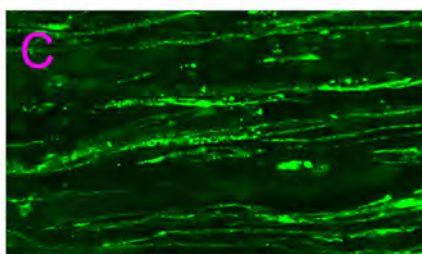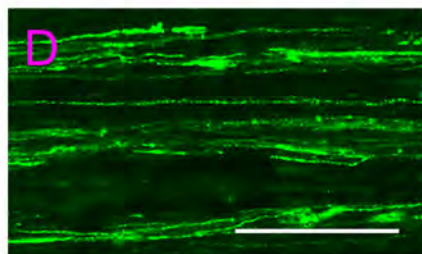

E

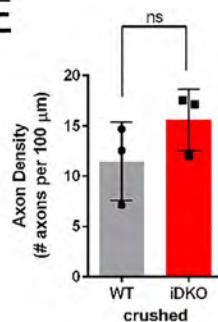

F

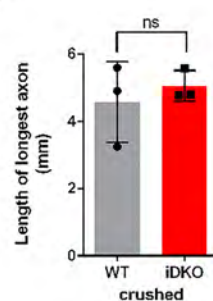



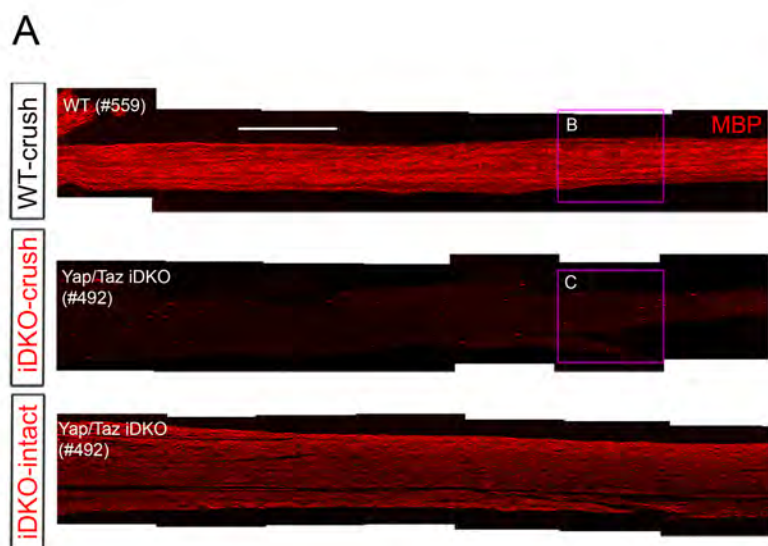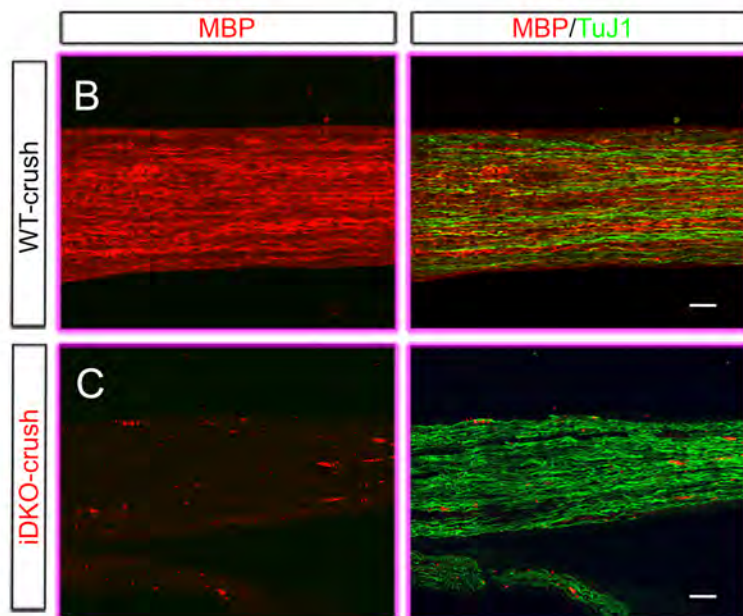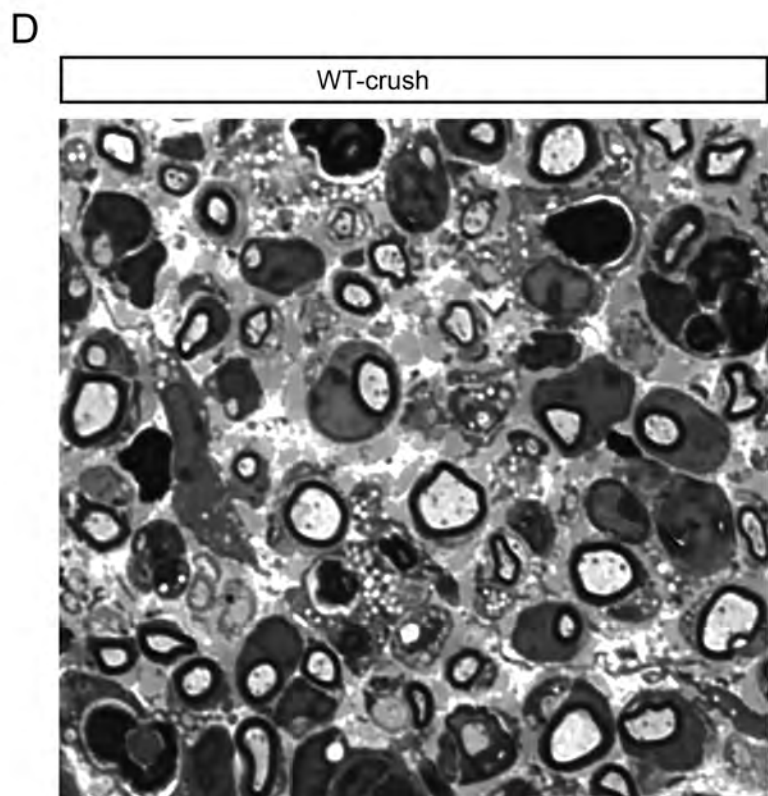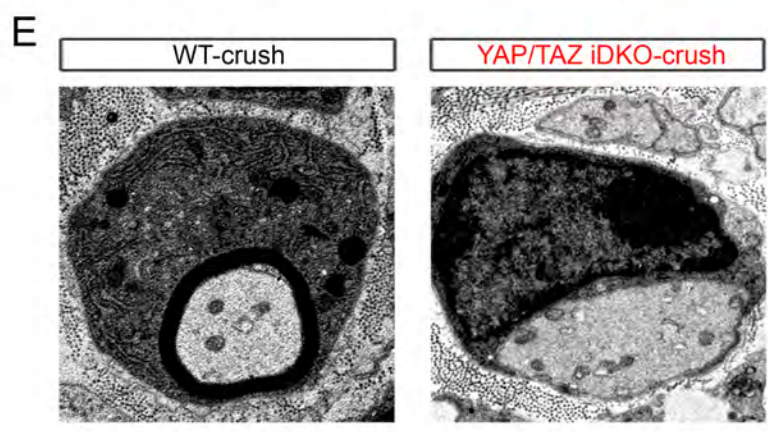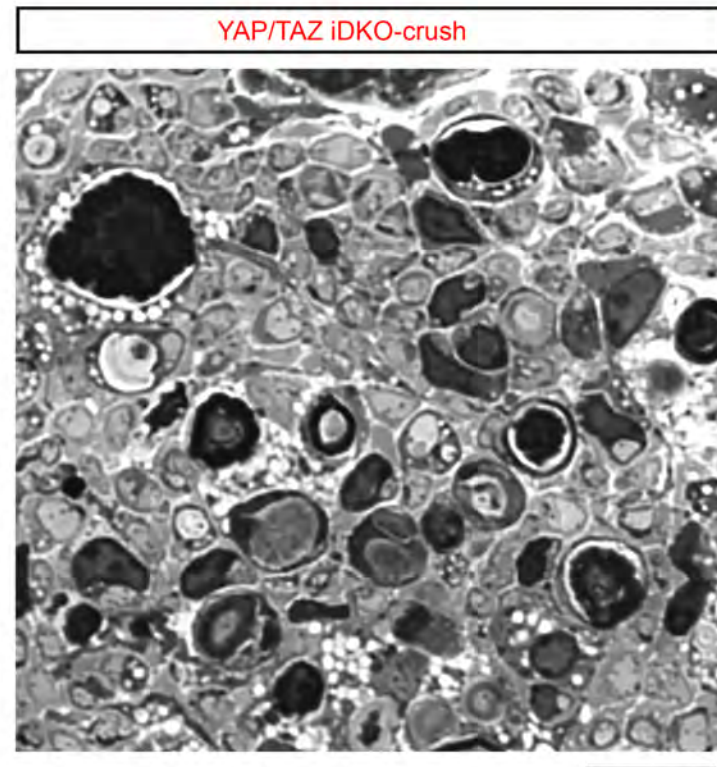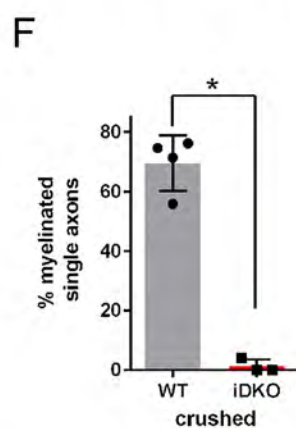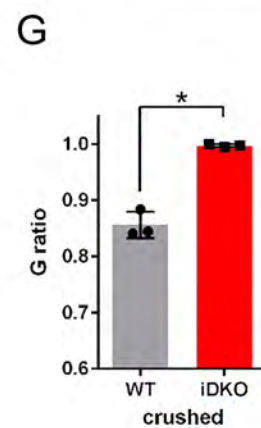

TUJ1

MBP

MBP/TUJ1

WT-crush

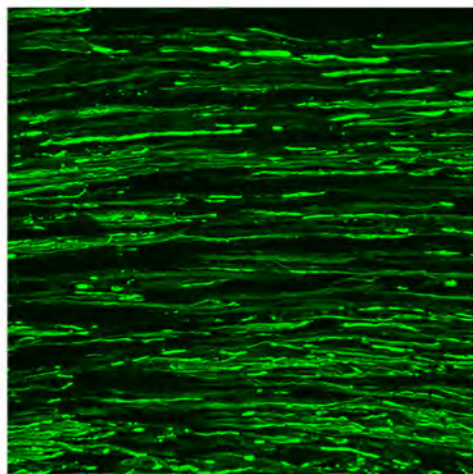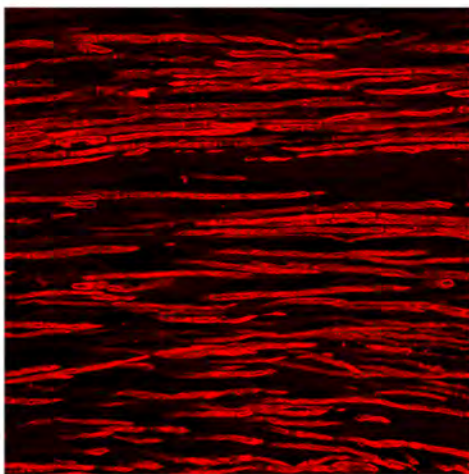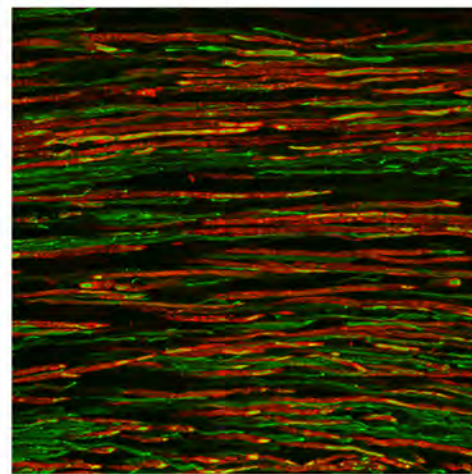

iDKO-crush

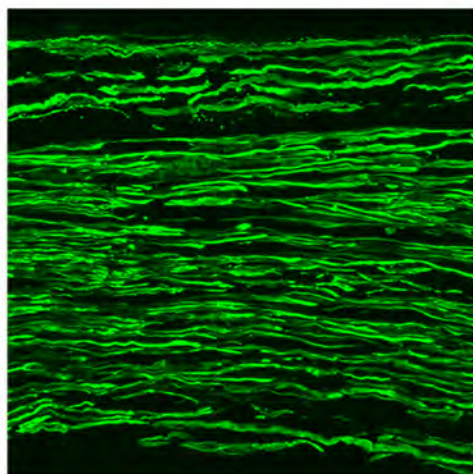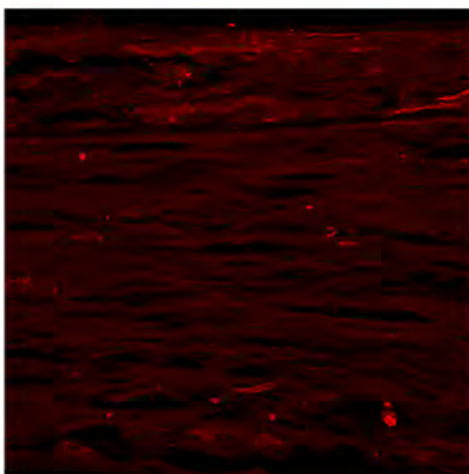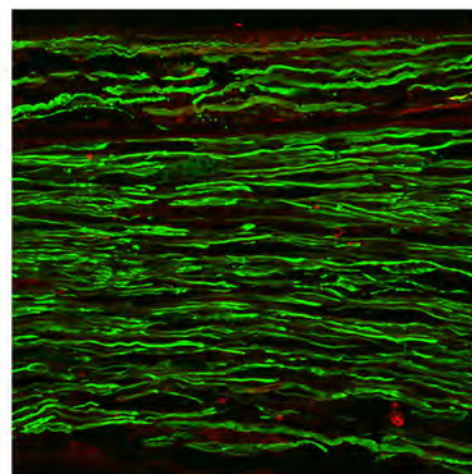

WT-intact

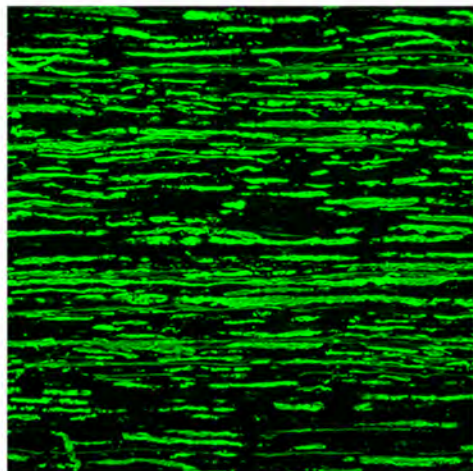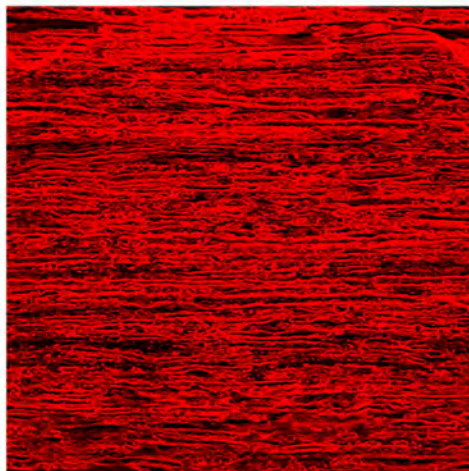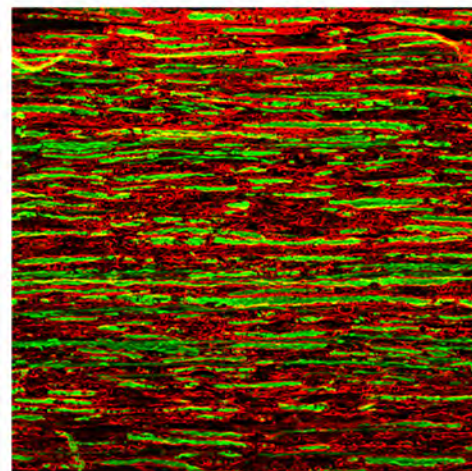

iDKO-intact

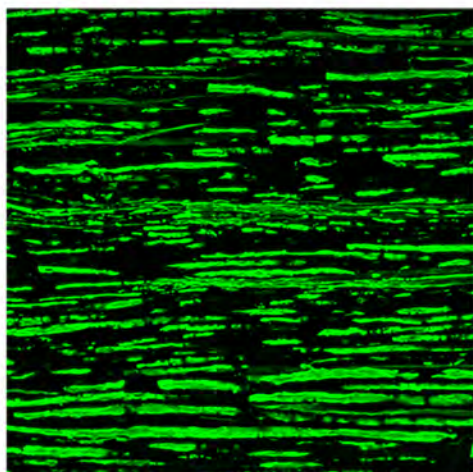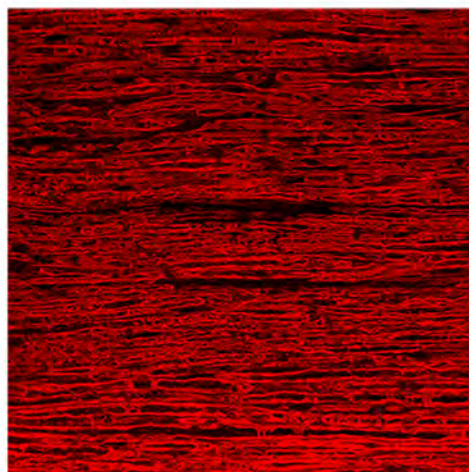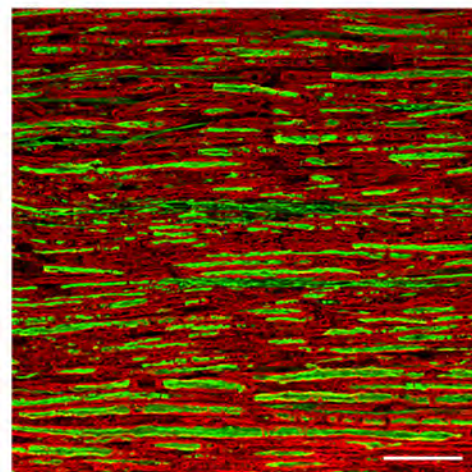

**A**

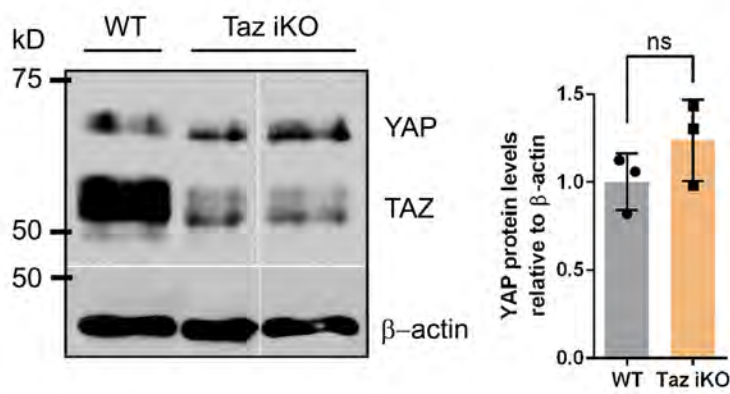

**B**

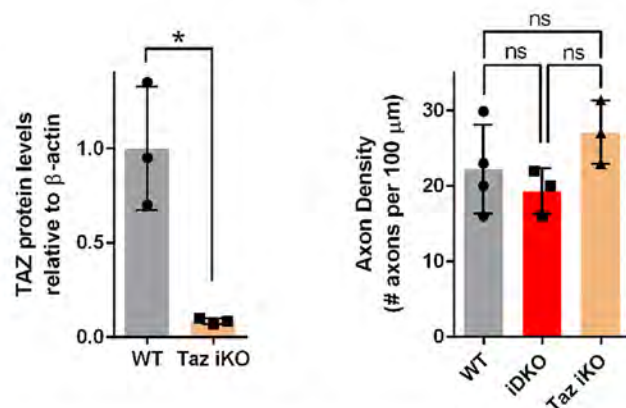

**C**

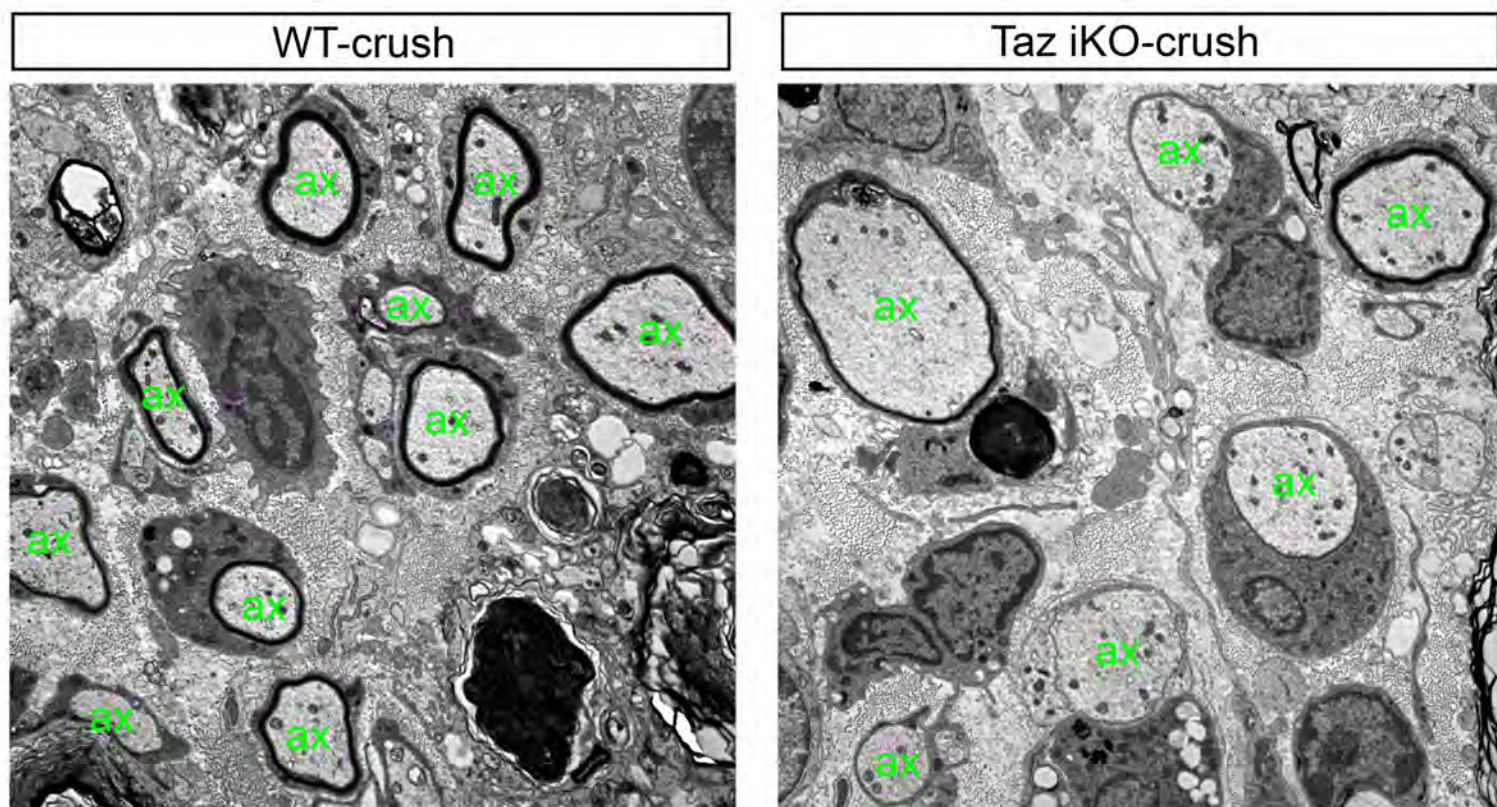

**D**

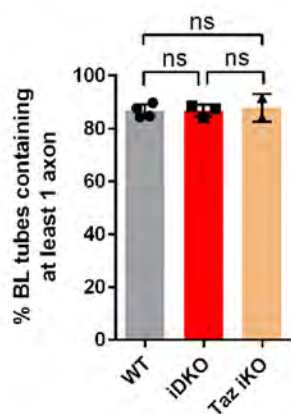

**E**

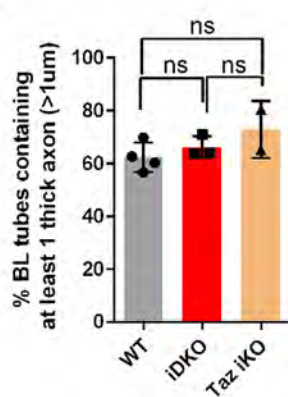

**F**

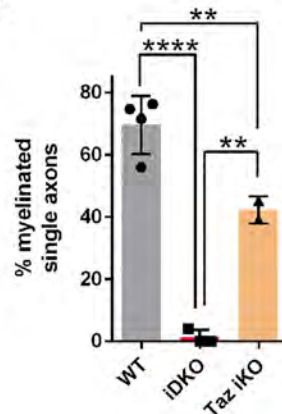

**G**

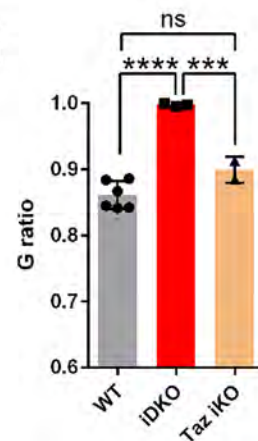

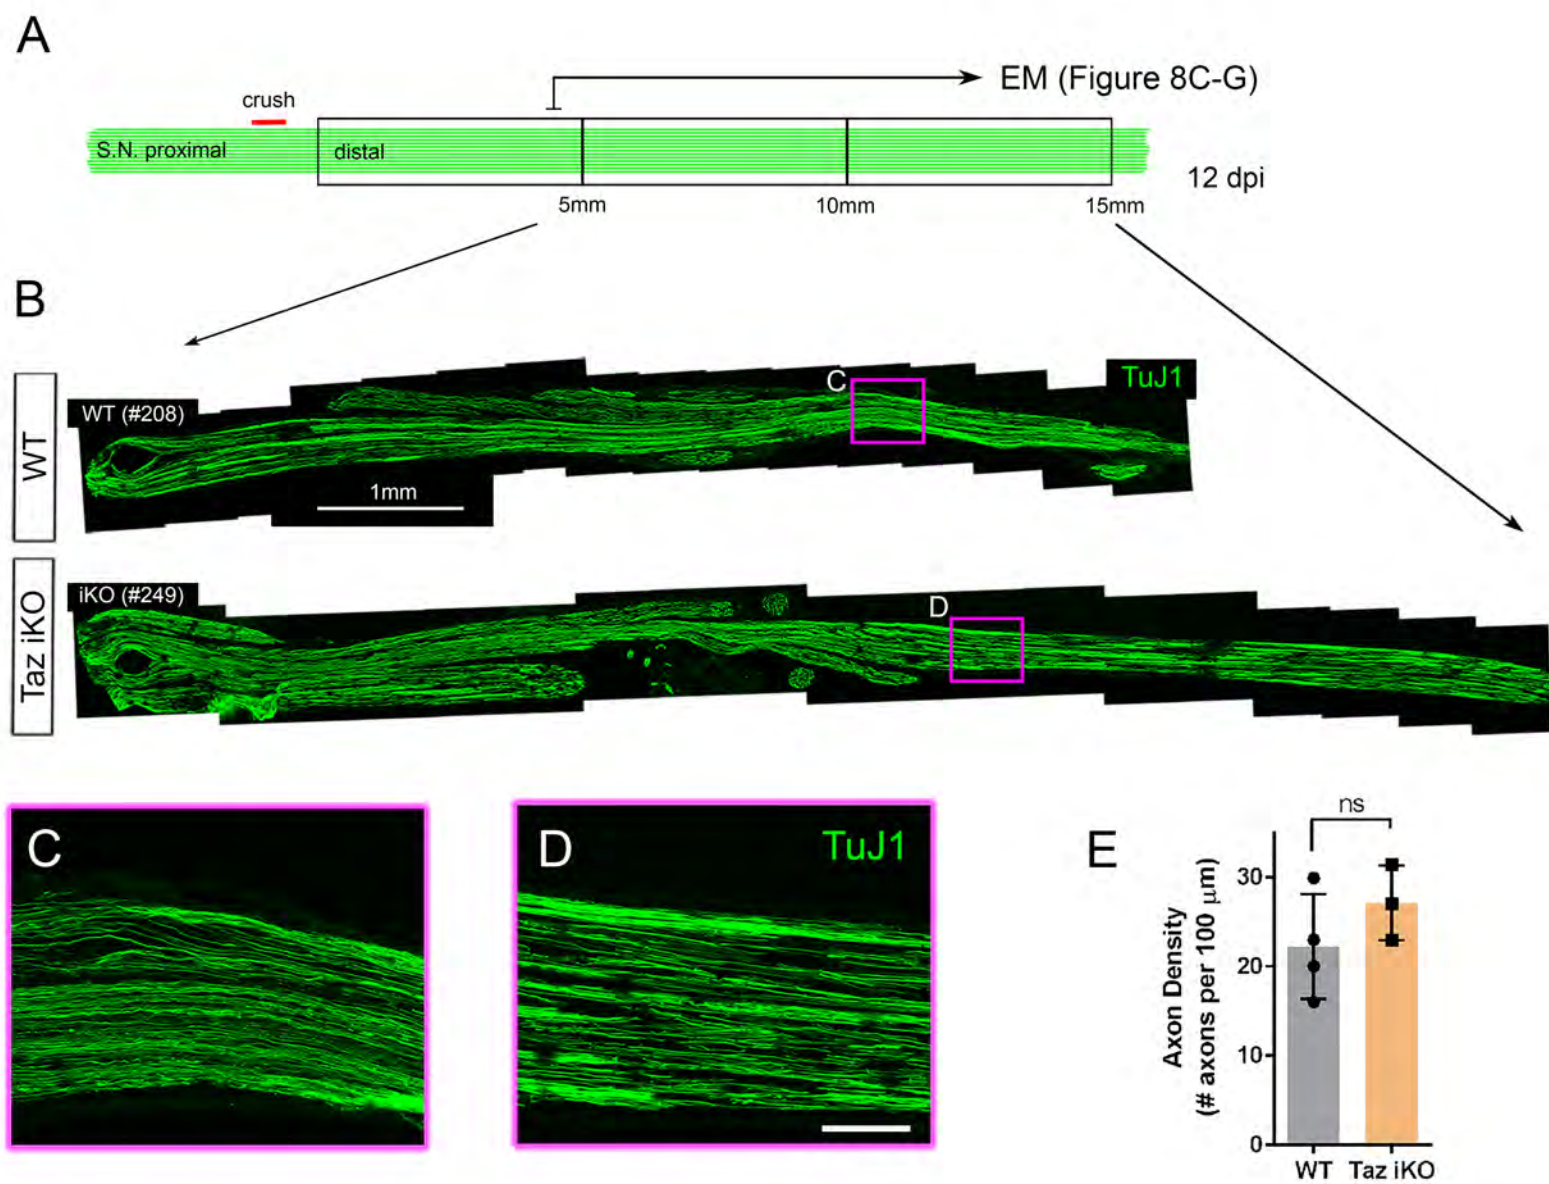

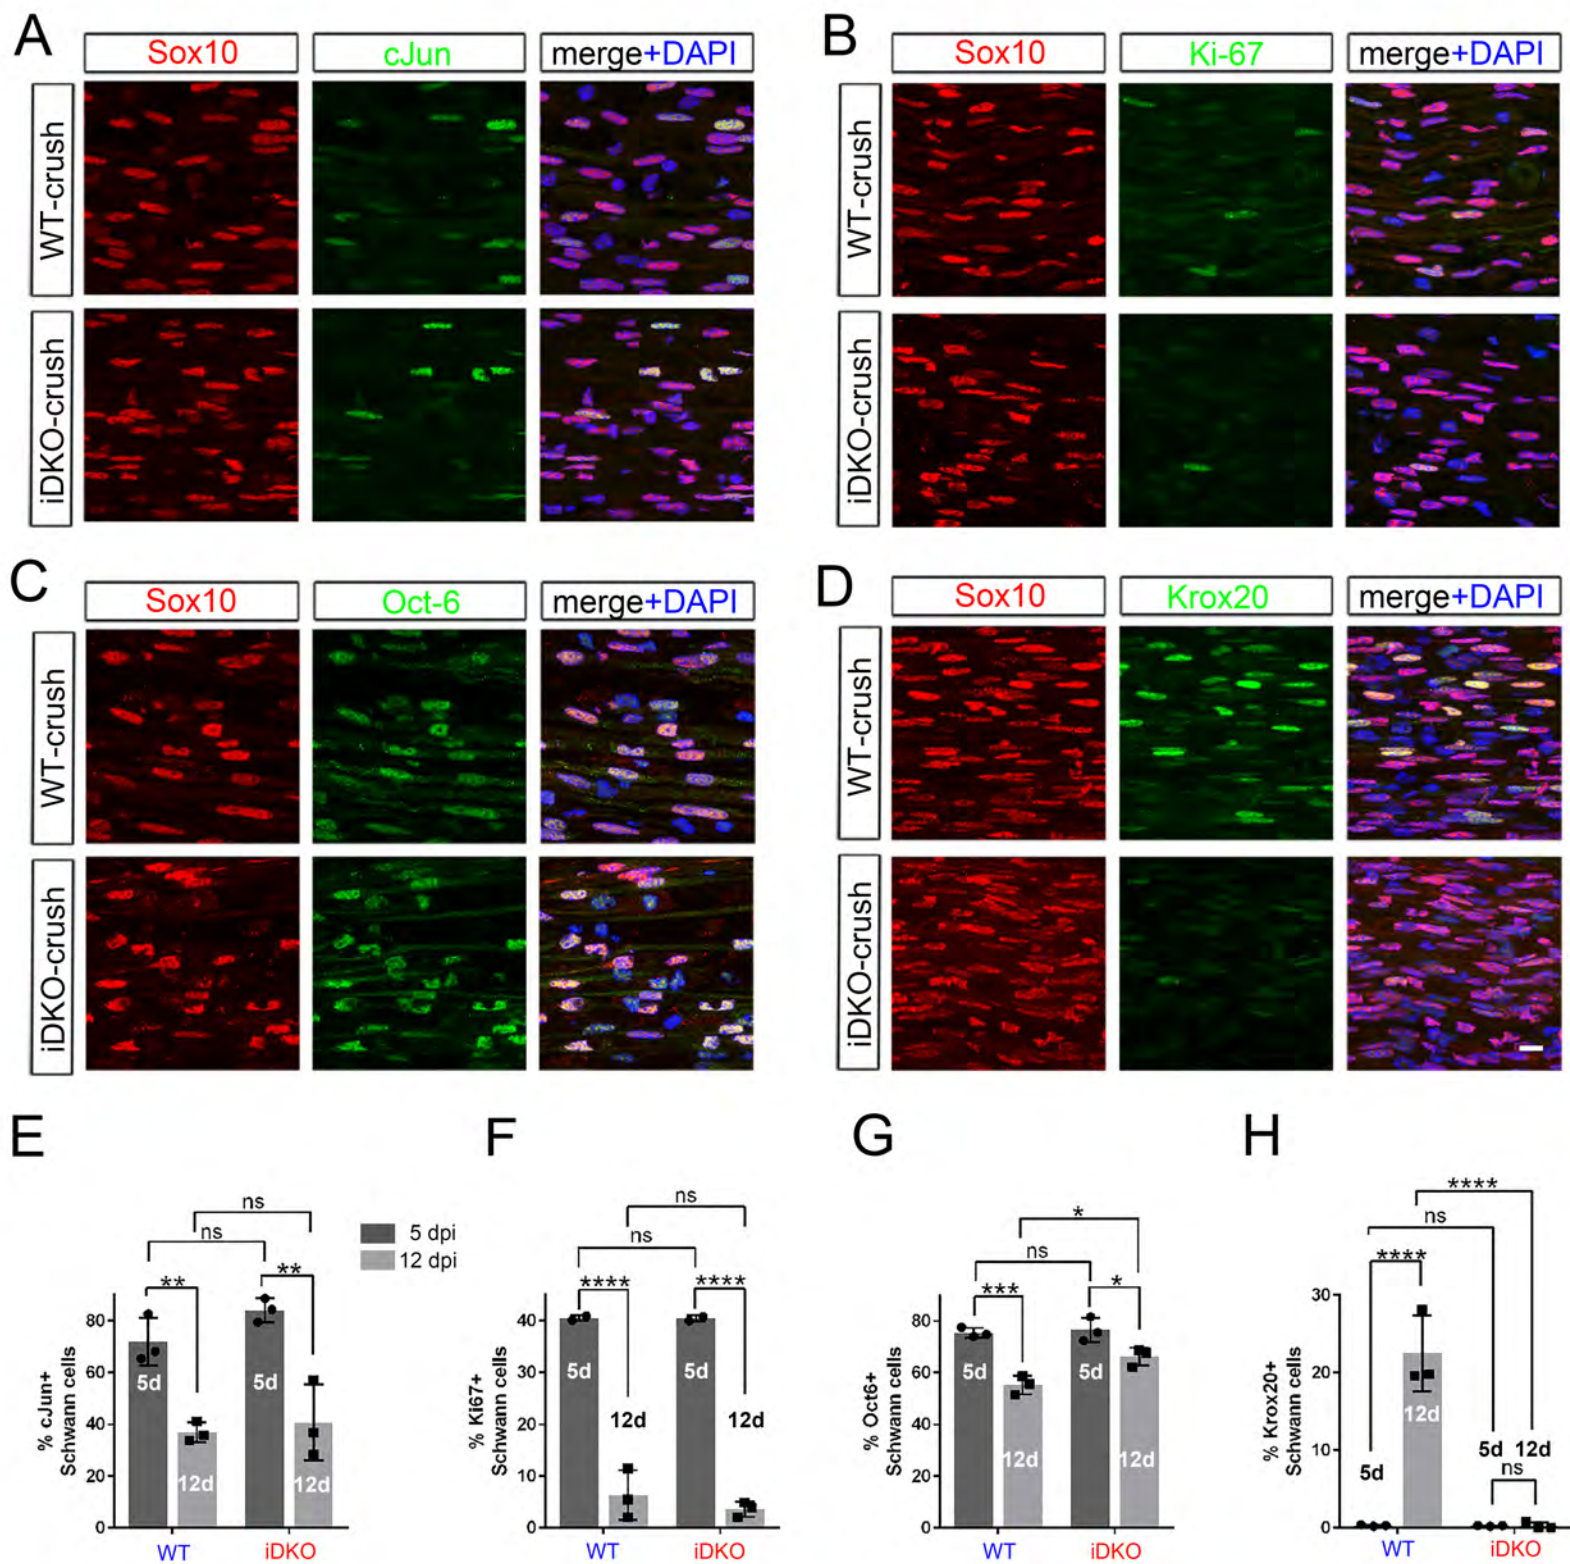

Source: https://www.biorxiv.org/content/10.1101/851618v2.full.pdf
